## **Impact of *BRCA* mutation status on tumor infiltrating lymphocytes (TILs), response to treatment, and prognosis in breast cancer patients treated with neoadjuvant chemotherapy.**

Beatriz Grandal<sup>1,10\*</sup>, Clémence Evrevin<sup>1\*</sup>, Enora Laas<sup>1</sup>, Isabelle Jardin<sup>1</sup>, Sonia Rozette<sup>1</sup>, Lucie Laot<sup>1</sup>, Elise Dumas<sup>10</sup>, Florence Coussy<sup>2</sup>, Jean-Yves Pierga<sup>2</sup>, Etienne Brain<sup>3</sup>, Claire Saule<sup>4</sup>, Dominique Stoppa-Lyonnet<sup>4</sup>, Sophie Frank<sup>4</sup>, Claire Sénéchal<sup>5</sup>, Marick Lae<sup>6,7</sup>, Diane De Croze<sup>6</sup>, Guillaume Bataillon<sup>8</sup>, Julien Guerin<sup>9</sup>, Fabien Reyal<sup>1,10\*\*</sup>, Anne-Sophie Hamy<sup>10\*\*</sup>

\* Beatriz Grandal and Clémence Evrevin / \*\* Fabien Reyal and Anne-Sophie Hamy contributed equally to this work.

### **Affiliations:**

1. *Department of Surgery, Institut Curie, 26 rue d'Ulm, 75005 Paris, France*
2. *Department of Oncology, Institut Curie, 26 rue d'Ulm, 75005 Paris, France*
3. *Department of Oncology, Centre René Huguenin – Institut Curie, 35 rue Dailly, 92210 St Cloud, France*
4. *Department of Genetics, Institut Curie, 26 rue d'Ulm, 75005 Paris, France INSERM U830, Institut Curie Paris, Paris, France.*
5. *Department of Genetics, Institut Bergonié, 229 Cours de l'Argonne, 33000 Bordeaux, France*
6. *Department of Pathology, Centre René Huguenin - Institut Curie, 35 rue Dailly, 92210 St Cloud, France*
7. *Department of Pathology, Centre Henri Becquerel, INSERM U1245, uniRouen, University of Normandie, Rouen, France*
8. *Department of Pathology, Institut Curie, 26 rue d'Ulm, 75005 Paris, France*
9. *Data Office, Institut Curie, 25 rue d'Ulm, 75005 Paris, France*
10. *Residual Tumor & Response to Treatment Laboratory, RT2Lab, translational Research Department, INSERM, U932 Immunity and Cancer, Institut Curie, 26 rue d'Ulm, Paris, France*

NOTE: This preprint reports new research that has not been certified by peer review and should not be used to guide clinical practice.

**Running title:**

Impact of *BRCA* mutation status on TILs, pCR and survival in breast cancer patients treated with neoadjuvant chemotherapy.

**Keywords:**

BRCA, TILs, pCR, NAC, immunotherapy

**Financial Support:**

B.G.R. was supported by Alfonso Martin Escudero Foundation research grant.

**Corresponding author:**

Pr. Fabien REYAL

Institut Curie, 26 rue d'Ulm, 75005 Paris, France

+33 144324660/ Fax +33 153104037

fabien.reyal@curie.fr

**Conflict of interest**

The authors declare no potential conflicts of interest.

**Others**

Word count: 3152

Total number of figures: 4

Total number tables: 2

## Translational relevance

1 High lymphocytic infiltration (TILs) seem to reflect favorable host antitumor immune  
2 responses. In breast cancer, the variation of TILs before and after neoadjuvant chemotherapy  
3 (NAC) according to *BRCA* status has been poorly described. Little data is available on their  
4 value after treatment. We investigated TIL levels before and after NAC and response to  
5 treatment in 267 paired biopsy and surgical specimens.

6 In our study, luminal BCs were associated with pathologic complete response (pCR) and  
7 higher TIL levels after chemotherapy completion in patients with *BRCA* pathogenic  
8 mutations. Our data supports that (i) NAC should be reconsidered in luminal BCs with *BRCA*  
9 pathogenic mutation, (ii) TILs could be a biomarker for response to immune checkpoint  
10 blockade in luminal BCs with *BRCA* pathogenic variant who did not achieve a pCR and (iii)  
11 exploiting the antitumor immune response in luminal BCs could be an area of active research.

12

1 **Abstract:**

2 *Introduction:* Five to 10% of breast cancers (BCs) occur in a genetic predisposition context  
3 (mainly *BRCA* pathogenic variant). Nevertheless, little is known about immune tumor  
4 infiltration, response to neoadjuvant chemotherapy (NAC), pathologic complete response  
5 (pCR) and adverse events according to *BRCA* status.

6 *Material and methods:* Out of 1199 invasive BC patients treated with NAC between 2002 and  
7 2012, we identified 267 patients tested for a germline *BRCA* pathogenic variant. We evaluated  
8 pre-NAC and post-NAC immune infiltration (TILs). Response to chemotherapy was assessed  
9 by pCR rates. Association of clinical and pathological factors with TILs, pCR and survival  
10 was assessed by univariate and multivariate analyses.

11 *Results:* Among 1199 BC patients: 46 were *BRCA*-deficient and 221 *BRCA*-proficient or wild  
12 type (WT). At NAC completion, pCR was observed in 84/266 (31%) patients and pCR rates  
13 were significantly higher in *BRCA*-deficient BC ( $p= 0.001$ ), and this association remained  
14 statistically significant only in the luminal BC subtype ( $p= 0.006$ ). The interaction test  
15 between BC subtype and *BRCA* status was nearly significant ( $P_{interaction}=0.056$ ). Pre and post-  
16 NAC TILs were not significantly different between *BRCA*-deficient and *BRCA*-proficient  
17 carriers; however, in the luminal BC group, post-NAC TILs were significantly higher in  
18 *BRCA*-deficient BC. Survival analysis were not different between *BRCA*-carriers and non-  
19 carriers.

20 *Conclusion:* *BRCA* mutation status is associated with higher pCR rates and post-NAC TILs in  
21 patients with luminal BC. *BRCA*-carriers with luminal BCs may represent a subset of patients  
22 deriving higher benefit from NAC. Second line therapies, including immunotherapy after  
23 NAC, could be of interest in non-responders to NAC.

## 1 **Introduction**

2 **Neoadjuvant or pre-operative chemotherapy (NAC)** is classically administered to patients  
3 with inflammatory or locally advanced breast cancer (BC). Beyond increasing breast-  
4 conserving surgery rates (1), it also serves as an *in vivo* chemosensitivity test and the analysis  
5 of residual tumor burden may help understanding treatment resistance mechanisms (2). In  
6 addition, it helps refining the prognosis of patients after NAC, as pathological complete  
7 response (pCR) after NAC is associated with a better long term survival (1,3).

8 Nearly 5% of breast cancers occur in a context of **genetic predisposition**, mostly represented  
9 by monoallelic pathogenic variants of *BRCA1*, *BRCA2* or *PALB2* genes (4). Patients with  
10 loss-of-function of the BRCA1 or 2 proteins have a higher cumulated breast cancer risk, with  
11 a cumulated life time risk at eighty years old of 72% (*BRCA1*) and 69% (*BRCA2*)(5). The  
12 peak incidence for *BRCA1* mutation carriers occurs between 41 and 50 years old (28.3 per  
13 1000 person-years), whereas it occurs ten years later for *BRCA2* mutation carriers (30.6 per  
14 1000 person-years between 51 and 60) (5). *BRCA1* and *BRCA2* are tumor-suppressor genes  
15 that code for proteins involved in homologous recombination (HR) repair. HR deficiency  
16 (HRD) occurs when the second allele is inactivated by allelic deletion (often detected by  
17 LOH), genic alteration or promoter methylation (for *BRCA1* only). Biallelic *BRCA1/2*  
18 inactivation results in genomic instability and theoretically increases the somatic mutational  
19 load (6).

20 Tumors associated with germline or somatic *BRCA1/2* pathogenic mutations **display**  
21 **different patterns when compared with sporadic BCs**. Cancers occurring among *BRCA1*  
22 carriers are more frequently classified as medullary (7), whereas histological subtypes among  
23 *BRCA2* carriers tend to be more heterogeneous (8). In addition, *BRCA1* carriers are more  
24 frequently ER-negative, PR-negative and lack *HER2* amplification (*i.e.* display a triple

1 negative (TNBCs) phenotype (9))- whereas in *BRCA2* carriers, a similar prevalence of ER-  
2 positive tumors has been described when compared with sporadic controls (10–13).

3 Most of patients with TNBCs receive **chemotherapy** (14,15). Due to the alteration of *BRCA1*  
4 and *BRCA2* proteins in tumor cells, *BRCA*-mutated cells are unable to properly repair double-  
5 strand breaks, classically induced by DNA-alkylating agents (16). Hence, *BRCA* deficiency  
6 has sometimes been associated with a higher sensitivity to platinum agents when compared to  
7 other types of neoadjuvant chemotherapy regimens (17–19). However, the effectiveness of  
8 standard NAC in all BC subtypes associated with *BRCA* pathogenic variants compared to  
9 controls has been poorly explored so far.

10 The role of **tumor infiltrating lymphocytes (TILs)** in BC has been extensively studied over  
11 the last decade. High levels of TILs before NAC are associated with higher pCR rates and  
12 better survival, especially for TNBC and *HER2*-positive BCs (20,21). However, despite a  
13 growing interest in the field of immunity and oncology, characterization and quantification of  
14 TILs across all BC subtypes according to *BRCA* status has not been extensively described.  
15 Similarly, no study has evaluated so far, the evolution of immune infiltration after NAC  
16 according to *BRCA* status.

17 The objective of the current study is to determine if pre and post-NAC TILs, chemosensitivity  
18 and prognosis differ according to *BRCA* status in a cohort of BC patients treated with NAC.

19

## 1 **Material and methods:**

### 2 *Patients and Tumors*

3 The study was performed on a retrospective institutional cohort of 1199 female patients with  
4 T1-T3N<sub>x</sub>M0 invasive BC (NEOREP Cohort, CNIL declaration number 1547270) treated with  
5 NAC at Institute Curie (Paris and Saint-Cloud) between 2002 and 2012. The cohort included  
6 unifocal, unilateral, non-recurrent, non-metastatic tumors, excluding T4 tumors  
7 (inflammatory, chest wall or skin invasion). Approved by the Breast Cancer Study Group of  
8 Institute Curie, the study was conducted according to institutional and ethical rules  
9 concerning research on tissue specimens and patients. Informed consent from patients was not  
10 required.

11 Information on family history, clinical characteristics (age; menopausal status; body mass  
12 index) and tumor characteristics (clinical tumor stage and grade; histology; clinical nodal  
13 status; ER, PR and *HER2* status; BC subtype; mitotic index; Ki67) were retrieved from  
14 electronic medical records. All the patients received NAC, and additional treatments were  
15 decided according to national guidelines (see **Supplementary material**).

16

### 17 *Tumors samples*

18 In accordance with French national guidelines (22), cases were considered estrogen receptor  
19 (ER)-positive or progesterone receptor (PR)-positive if at least 10% of tumor cells expressed  
20 estrogen and/or progesterone receptors (ER/PR), and endocrine therapy was prescribed when  
21 this threshold was exceeded. *HER2* negative status was defined as 0 or 1 + on  
22 immunohistochemistry (IHC) stained tissue section. IHC 2 + scores were subsequently  
23 analyzed by fluorescence *in situ* hybridization (FISH) to confirm *HER2* positivity.

1 Pathological BC were classified into subtypes (TNBC, *HER2*-positive, and luminal *HER2*-  
2 negative [referred to hereafter as “luminal”]) (see **Supplementary material**).

3

4 ***TIL levels, pathological complete response and pathological review:***

5 TIL levels were evaluated retrospectively for research purposes, by two pathologists (ML and  
6 DdC) specialized in breast cancer. TIL levels were assessed on formalin-fixed paraffin-  
7 embedded (FFPE) tumor tissue samples from pretreatment core needle biopsies and the  
8 corresponding post-NAC surgical specimens, according to the recommendations of the  
9 international TILs Working Group before (23) and after NAC (24). TILs were defined as the  
10 presence of a mononuclear cell infiltrate (including lymphocytes and plasma cells, excluding  
11 polymorphonuclear leukocytes). TILs in direct contact with tumor cells were counted as intra-  
12 tumoral TILs (IT TILs) and those in the peri-tumoral areas as stromal TILs (str TILs). They  
13 were evaluated both in the stroma and within tumor scar border, after excluding areas around  
14 ductal carcinoma *in situ*, tumor zones with necrosis and artifacts, and were scored  
15 continuously as the average percentage of stroma area occupied by mononuclear cells.

16 We defined pathological complete response (pCR) as the absence of invasive residual tumor  
17 from both the breast and axillary nodes (ypT0/is N0).

18

19 ***BRCA status***

20 Genetic counseling was offered based on individual or family criteria (see Supplemental  
21 material). When constitutional genetic analysis of *BRCA1* and *BRCA2* genes were required,  
22 Denaturing High Performance Liquid Chromatography (DHPLC) and Sanger sequencing  
23 were performed to search for point alterations, and Quantitative Multiplex Polymerase Chain  
24 Reaction of Short Fluorescent (QMPSF) to research large gene rearrangements between 2002



1 and 2012. In case of previously known pathogenic familial variants, targeted tests were  
2 performed.

3

#### 4 ***Survival endpoints***

5 Relapse-free survival (RFS) was defined as the time from surgery to death, loco-regional  
6 recurrence or distant recurrence, whichever occurred first. Overall survival (OS) was defined  
7 as the time from surgery to death. For patients for whom none of these events were recorded,  
8 data was censored at the time of last known contact. Survival cutoff date analysis was  
9 February 1<sup>st</sup>, 2019.

10

#### 11 ***Statistical analysis***

12 Pre- and post-NAC TIL levels were analyzed as continuous variables. All analyses were  
13 performed on the whole population and after stratification by BC subtype. To compare  
14 continuous variables among different groups, Wilcoxon-Mann-Whitney test was used for  
15 groups including less than 30 patients and for variables displaying multimodal distributions;  
16 otherwise, student t-test was used. Association between categorical variables was assessed  
17 with chi-square test, or with the Fisher's exact test if at least one category included less than  
18 three patients. In boxplots, lower and upper bars represented the first and third quartile  
19 respectively, the medium bar was the median, and whiskers extended to 1.5 times the inter-  
20 quartile range. Factors predictive of pCR were introduced in a univariate logistic regression  
21 model. Covariates selected for multivariate analysis were those with a *p*-value no greater than  
22 0.1 after univariate analysis. Survival probabilities were estimated by Kaplan-Meyer method,  
23 and survival curves were compared with log-rank tests. Hazard ratios (HR) and their 95%  
24 confidence intervals (CI) were calculated with the Cox proportional hazard model. Analyses  
25 were performed with R software version 3.1.2. Significance threshold was of 5%.

## 1 **Results**

### 2 ***Study population and tumors characteristics***

3 The total number of patients included in the neoadjuvant cohort was 1199. Among the whole  
4 population, germline *BRCA* pathogenic variant status was available for 267 patients (22.3%),  
5 and was not obtained for 932 patients (77.73%, **Supplementary Figs. S1**). Median age of  
6 cohort's population was 48 years old (range 24-80) and most patients (n=747, 62%) were  
7 premenopausal. Median BMI index was 24.74, and 25.8% had direct family history of breast  
8 cancer. Patients repartition by subtype was as follows: luminal (n=518, 44%), TNBC (n= 376,  
9 31%), *HER2*-positive (n= 295, 25%).

10 Patients with available *BRCA* status were significantly different from patients with *BRCA*  
11 status unknown. They were younger, had lower body mass index, were more likely to be  
12 diagnosed with grade III, TNBC of no specific type (NST), and to receive standard  
13 anthracyclines-taxanes containing regimens than patients not screened (p< 0.001) (**Table1**,  
14 **Supplementary Figs. S2**).

15 Among the 267 screened patients, the distribution of *BRCA* status was as follows: *BRCA*-  
16 proficient n=221 (83%); *BRCA*-deficient, n= 46 (17%) (*BRCA1*-deficient, n=31 (67.39%);  
17 *BRCA2*-deficient, n = 14 (30.43%) and *BRCA1+2*-deficient, n=1 (2.17%)). Median age at  
18 diagnosis for patient with available *BRCA* mutation status was 40 years old (range 24-70) and  
19 most patients (n=227, 85%) were premenopausal. Patients repartition by subtype was as  
20 follows: luminal (n=90, 33.7%), TNBC (n= 110, 41.2%), *HER2*-positive (n= 67, 25.1%)  
21 (**Supplementary Table S1, Supplementary Fig. S2**).

22 Carriers of a *BRCA* pathogenic variant were more likely to have familial history of breast  
23 cancer (73.9% vs. 52.3%, p= 0.012), and to be diagnosed with TNBC (58.7% vs 37.6%; p=

1 0.006) than *BRCA*-proficient patients (**Table 1**). No other pattern among age, body mass  
2 index, histology, tumor size, nor proliferation indices (grade, mitotic index, KI67) was  
3 significantly different according to *BRCA* variant status. These results were substantially  
4 similar after the subgroup analysis of BC subtype (**Supplementary Table S2**).

**Table1.** Patients' characteristics among the whole population

| Characteristics       | Class      | All              | BRCA mutation    | BRCA wild-type   | Not screened     | p      |
|-----------------------|------------|------------------|------------------|------------------|------------------|--------|
| n=                    |            | 1199(100%)       | 46(3.8%)         | 221(18.4%)       | 932(77.7%)       |        |
| Age (mean)            |            | 48.6             | 39.5             | 41.7             | 50.6             | <0.01  |
| Menopausal status     | pre        | 747 (62.8)       | 41 (89.1%)       | 187 (85.0%)      | 519 (56.2%)      | <0.01  |
|                       | post       | 442 (37.2)       | 5 (10.9%)        | 33 (15.0%)       | 404 (43.8%)      |        |
| BMI (mean)            |            | 24.7             | 22.8             | 23.6             | 25.1             | <0.01  |
| BMI class             | [15,19]    | 72 (6.0)         | 6 (13.3)         | 17 (7.7)         | 49 (5.3)         | <0.01  |
|                       | (19,25]    | 664 (55.7)       | 31 (68.9)        | 147 (66.5)       | 486 (52.4)       |        |
|                       | (25,30]    | 299 (25.1)       | 4 (8.9)          | 43 (19.5)        | 252 (27.2)       |        |
|                       | (30,50]    | 158 (13.2)       | 4 (8.9)          | 14 (6.3)         | 140 (15.1)       |        |
| Family history of BC  | no         | 887 (74.2)       | 12 (26.1%)       | 104 (47.7%)      | 771 (82.7%)      | <0.01  |
|                       | yes        | 309 (25.8)       | 34 (73.9%)       | 114 (52.3%)      | 161 (17.3%)      |        |
| Clinical tumor size   | T1         | 70 (5.8%)        | 5 (10.9%)        | 22 (10.0%)       | 43 (4.6%)        | <0.01  |
|                       | T2         | 798 (66.6%)      | 28 (60.9%)       | 153 (69.2%)      | 617 (66.3%)      |        |
|                       | T3         | 330 (27.5%)      | 13 (28.3%)       | 46 (20.8%)       | 271 (29.1%)      |        |
| Clinical nodal status | N0         | 525 (43.8%)      | 17 (37.0%)       | 93 (42.1%)       | 415 (44.6%)      | 0.51   |
|                       | N1-N2-N3   | 673 (56.2%)      | 29 (63.1%)       | 128 (57.9%)      | 516 (55.4%)      |        |
| Histology             | NST        | 1062 (90%)       | 43 (93.5%)       | 213 (96.4%)      | 806 (88.3%)      | 0.03   |
|                       | others     | 118 (10%)        | 3 (6.5%)         | 8 (3.6%)         | 108 (11.6%)      |        |
| Grade                 | I-II       | 479 (41.4%)      | 10 (23.3%)       | 76 (34.7%)       | 393 (43.9%)      | 0.01   |
|                       | III        | 678 (58.6%)      | 33 (76.7%)       | 143 (65.3%)      | 502 (56.1%)      |        |
| Mitotic Index (mean)  |            | 25.1             | 30.8             | 25.6             | 24.6             | 0.25   |
| Subtype               | luminal    | 528 (44.0%)      | 15 (32.6%)       | 75 (33.9%)       | 438 (47.0%)      | <0.01  |
|                       | TNBC       | 376 (31.4%)      | 27 (58.7%)       | 83 (37.6%)       | 266 (28.5%)      |        |
|                       | HER2       | 295 (24.6%)      | 4 (8.7%)         | 63 (28.5%)       | 228 (24.5%)      |        |
| str TILs (mean)       |            | 20.0 [10.0-30.0] | 20.0 [13.8-40.0] | 20.0 [10.0-40.0] | 15.0 [10.0-30.0] | 0.02   |
| IT TILs (mean)        |            | 5.0 [5.0-15.0]   | 5.0 [5.0-11.2]   | 7.5 [5.0-20.0]   | 5.0 [3.0-15.0]   | 0.47   |
| NAC Regimen           | AC         | 235 (19.6%)      | 4 (8.7%)         | 25 (11.4%)       | 206 (22.2%)      | <0.01  |
|                       | AC-Taxanes | 845 (70.7%)      | 41 (89.1%)       | 180 (81.8%)      | 624 (67.1%)      |        |
|                       | Taxanes    | 25 (2.1%)        | 1 (2.2%)         | 6 (2.7%)         | 18 (1.9%)        |        |
|                       | Others     | 91 (7.6%)        | 0 (0.0%)         | 9 (4.1%)         | 82 (8.8%)        |        |
| pCR class             | No pCR     | 911 (76.2)       | 25 (54.3)        | 157 (71.4)       | 729 (78.4)       | <0.001 |
|                       | pCR        | 285 (23.8)       | 21 (45.7)        | 63 (28.6)        | 201 (21.6)       |        |
| Nodal involvement     | 0          | 682 (57.0)       | 35 (76.1)        | 141 (64.1)       | 506 (54.4)       | 0.003  |
|                       | 1-3        | 341 (28.5)       | 6 (13.0)         | 58 (26.4)        | 277 (29.8)       |        |
|                       | ≥4         | 174 (14.5)       | 5 (10.9)         | 21 (9.5)         | 148 (15.9)       |        |
| str TILs (mean)       |            | 10.0 [5.0-15.0]  | 15.0 [5.0-20.0]  | 10.0 [5.0-15.0]  | 10.0 [5.0-15.0]  | 0.36   |
| IT TILs (mean)        |            | 5.0 [2.0-10.0]   | 5.0 [4.3-10.0]   | 5.0 [2.0-10.0]   | 5.0 [2.0-10.0]   | 0.57   |

Missing data : Menopausal status, n=10; BMI (continuous), n=6; BMI class, n=6; Family history, n=3; Clinical tumor stage, n=1; Clinical nodal status, n=1; Histology, n=19; Grade, n=42; Mitotic index, n=502; Pre-NAC str TILs, n=482; Pre-NAC IT TILs, n=482; NAC regimen, n=3; pCR status, n=3; Post-NAC Nodal involvement, n=2; Post-NAC str TILs, n=482; Post-NAC IT TILs, n=714.

Abbreviations: NAC=neoadjuvant chemotherapy ; BMI=body mass index; NST= no special type; TNBC= triple negative breast cancer ; str TILs= stromal tumor-infiltrating lymphocytes ; IT TILs= intratumoral-infiltrating lymphocytes;

AC=anthracyclines; pCR=Pathologic complete response.

The "n" denotes the number of patients. In case of categorical variables, percentages are expressed between brackets.

In case of continuous variables, mean value is reported. In case of nonnormal continuous variables, median value is reported, with interquartile range between brackets.

- 1
- 2 Baseline TILs were available for 192 out of 267 screened patients (72%). Neither pre-NAC
- 3 str TIL levels (Figs 1A-D), nor IT TILs (Figs 1E-H) were significantly different by BRCA
- 4 status (Supplementary Table S1), nor in each BC subtype (Supplementary Table S2).

- 1 There was a strong, positive, linear relationship between stromal and intra-tumoral TILs
- 2 (Spearman correlation coefficient of 0.74,  $p < 0.001$ , **Supplementary Fig. S3**)

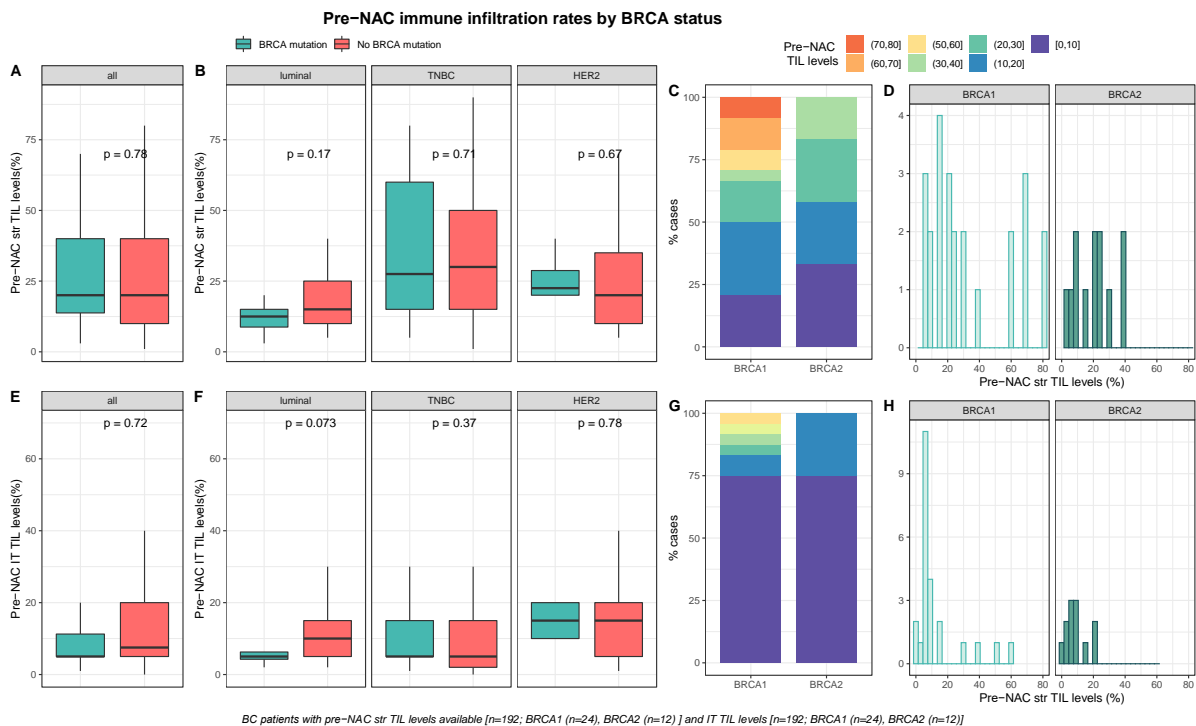

3  
4 **Figure 1.** Associations between pre-NAC TILs and *BRCA* status in whole population, and by breast cancer subtype. Bottom and top bars of  
5 the boxplots represent the first and third quartiles, respectively, the medium bar is the median, and whiskers extend to 1.5 times the  
6 interquartile range. **A**, stromal lymphocytes among the whole population (All(n=192), *BRCA* mutation (n=36), *BRCA* wild-type(n=156)). **B**,  
7 stromal lymphocytes in each BC subtype (Luminal(n=52), *BRCA* mutation(n=8), *BRCA* wild-type(n=44); TNBC(n=97), *BRCA* mutation(n=24),  
8 *BRCA* wild-type(n=73); *HER2*(n=43),*BRCA* mutation(n=4), *BRCA* wild-type(n=39)). **C**, percentage of tumor according to pre-NAC stromal  
9 lymphocytes levels binned by 10% increment in patients with *BRCA*-deficient (*BRCA1* (n=24), *BRCA2*(n=12)). **D**, distribution of pre-NAC  
10 stromal lymphocytes by gene mutations (histogram plot) in patients with *BRCA*-deficient (*BRCA1* (n=24), *BRCA2*(n=12)). **E**, intratumoral  
11 lymphocytes among the whole population (All(n=192), *BRCA* mutation (n=36), *BRCA* wild-type(n=156)). **F**, intratumoral lymphocytes in each  
12 BC subtype (Luminal(n=52), *BRCA* mutation(n=8), *BRCA* wild-type(n=44); TNBC(n=97), *BRCA* mutation(n=24), *BRCA* wild-type(n=73);  
13 *HER2*(n=43),*BRCA* mutation(n=4), *BRCA* wild-type(n=39)). **G**, Percentage of tumor according to pre-NAC intratumoral lymphocytes levels  
14 binned by 10% increment in patients with *BRCA*-deficient (*BRCA1* (n=24), *BRCA2*(n=12)). **H**, distribution of pre-NAC intratumoral  
15 lymphocytes by gene mutations (histogram plot) in patients with *BRCA*-deficient (*BRCA1* (n=24), *BRCA2*(n=12)).

## 16 17 18 **Response to treatment and post-NAC immune infiltration**

### 19 *Response to treatment*

20 At NAC completion, pCR was observed in 84 out of 266 (31%) patients and pCR rates were  
21 significantly different by BC subtype (luminal: 10% (9/89), TNBC: 45% (49/110) and *HER2*-  
22 positive 39% (26/67),  $p < 0.001$ ). Pre-NAC str TIL levels were significantly higher in tumors  
23 for which pCR was achieved ( $p < 0.001$ ) and there was a significant association between pre-  
24 NAC TIL levels and pCR status in the whole population (all: OR = 1.03, CI95% [ 1.02 – 1.05

1 ],  $p < 0.001$ ; Supplementary Fig. S3) and in the TNBC subgroup (luminal: OR = 1.03 , CI95%  
 2 [ 1 – 1.09 ],  $p = 0.21$ ; TNBC: OR = 1.03; CI95% [ 1–1.04],  $p = 0.007$  ; *HER2*-positive: OR =  
 3 1.02, CI95% [ 0.99–1.06],  $p = 0.23$ ; **Supplementary Fig. S4**).

4 pCR rates were significantly higher in patients with *BRCA*-deficient breast cancers (45.7%  
 5 (21/46) versus 28 % (63/221) in *BRCA*-proficient,  $p < 0.035$ , **Supplementary Table S1**,  
 6 **Figure 2**). After the subgroup analysis of BC subtype, this was confirmed only in the luminal  
 7 BC subtype (33.3% (5/15),  $p = 0.006$ ), but not in TNBC and *HER2*-positive BCs (48.1%  
 8 (13/27),  $p = 0.823$  and 75% (3/4),  $p = 0.291$ , respectively, **Supplementary Table S2, Figure**  
 9 **2**). The interaction test between BC subtype and *BRCA* status was nearly significant  
 10 ( $P_{interaction} = 0.056$ ).

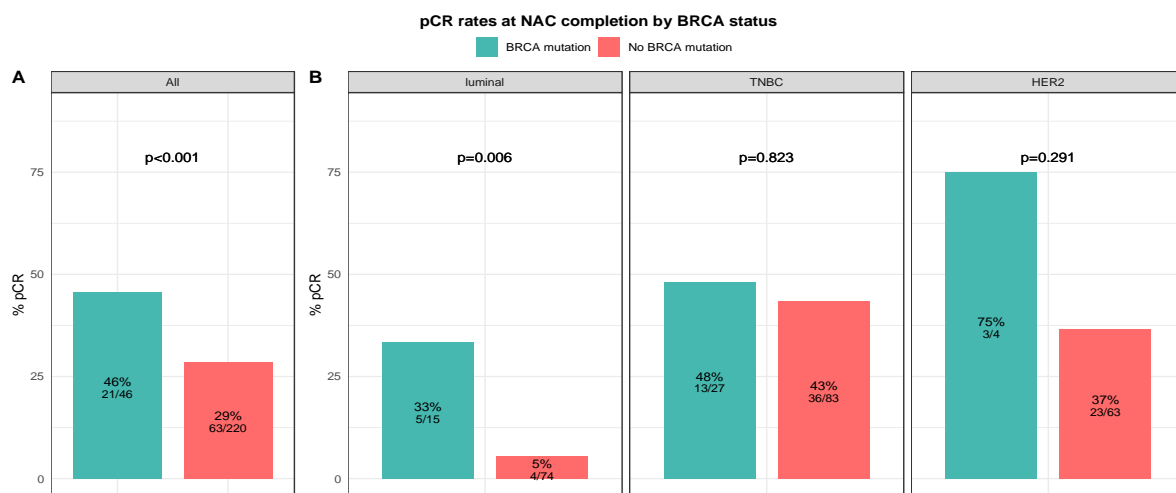

11 BC patients with pCR rates treated with NAC [(n=266); Luminal (n= 89), TNBC (n= 110), *HER2*-positive (n= 67)]

12 **Figure 2.** Barplot of associations between response to treatment and *BRCA* status in whole population, and by breast cancer subtype. **A**,  
 13 among the whole population (All(n=266), *BRCA* mutation (n=46), *BRCA* wild-type(n=220)). **B**, by BC subtype (Luminal(n=89), *BRCA*  
 14 mutation(n=15), *BRCA* wild-type(n=74); TNBC(n=110), *BRCA* mutation(n=27), *BRCA* wild-type(n=83); *HER2*(n=67),*BRCA* mutation(n=4),  
 15 *BRCA* wild-type(n=63)).

16 However, *BRCA* status was not significantly associated with pCR after multivariate analysis,  
 17 and only BC subtype (TNBC, OR = 7.14, CI95% [ 3.39 - 16.57 ],  $p < 0.001$ ; *HER2*-positive,  
 18 OR = 5.64, CI95% [ 2.5 - 13.78 ],  $p < 0.001$ ), tumor size (T2, OR = 0.37, CI95% [ 0.16 - 0.83  
 19 ],  $p = 0.017$ ; T3, OR = 0.21, CI95% [ 0.08 - 0.55],  $p = 0.002$ ) and pre-NAC str and IT TILs

1 (OR = 1.03, CI95% [1.02 - 1.05 ],  $p= 0.001$  and OR = 1.04, CI95% [1.02 - 1.07 ],  $p= 0.002$ )  
 2 were independent predictors of pCR (**Supplementary Table S3**).

3 **Post-NAC Immune Infiltration by BRCA status**

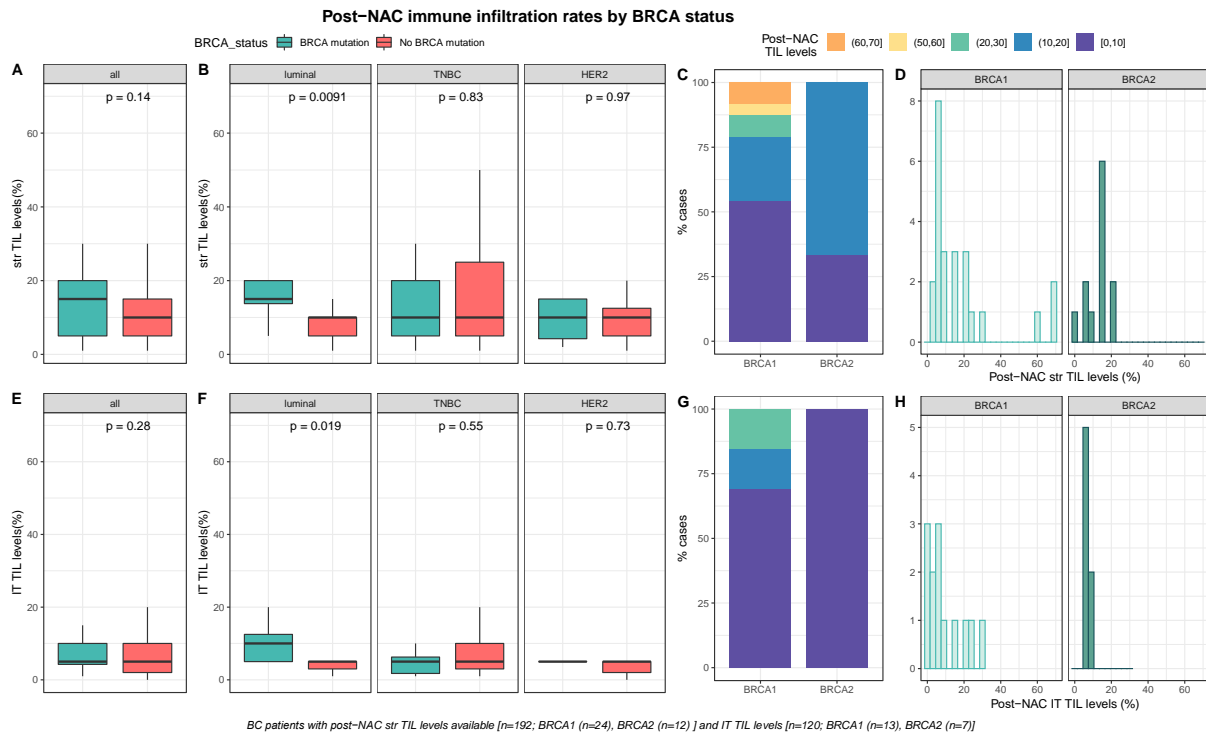

4  
 5 **Figure 3.** Associations between post-NAC TILs and *BRCA* status in whole population, and after stratification by breast cancer subtype.  
 6 Bottom and top bars of the boxplots represent the first and third quartiles, respectively, the medium bar is the median, and whiskers  
 7 extend to 1.5 times the interquartile range. **A**, stromal lymphocytes among the whole population (All(n=192), *BRCA* mutation (n=36), *BRCA*  
 8 wild-type(n=156)). **B**, stromal lymphocytes in each BC subtype (Luminal(n=52), *BRCA* mutation(n=8), *BRCA* wild-type(n=44); TNBC(n=97),  
 9 *BRCA* mutation(n=24), *BRCA* wild-type(n=73); *HER2*(n=43),*BRCA* mutation(n=4), *BRCA* wild-type(n=39)). **C**, Percentage of tumor according  
 10 to post-NAC stromal lymphocytes levels binned by 10% increment in patients with *BRCA*-deficient (*BRCA1* (n=24), *BRCA2*(n=12)). **D**,  
 11 distribution of post-NAC stromal lymphocytes by gene mutations (histogram plot) in patients with *BRCA*-deficient (*BRCA1*(n=24),  
 12 *BRCA2*(n=12)). **E**, intratumoral lymphocytes among the whole population (All(n=120), *BRCA* mutation (n=20), *BRCA* wild type(n=100)). **F**,  
 13 intratumoral lymphocytes in each BC subtype (Luminal(n=44), *BRCA* mutation(n=7), *BRCA* wild-type(n=37); TNBC(n=50), *BRCA*  
 14 mutation(n=12), *BRCA* wild-type(n=38); *HER2*(n=26),*BRCA* mutation(n=1), *BRCA* wild-type(n=25)). **G**, percentage of tumor according to  
 15 post-NAC intratumoral lymphocytes levels binned by 10% increment in patients with *BRCA*-deficient (*BRCA1* (n=13), *BRCA2*(n=7)). **H**,  
 16 distribution of pre-NAC intratumoral lymphocytes by gene mutations (histogram plot) in patients with *BRCA*-deficient (*BRCA1* (n=13),  
 17 *BRCA2*(n=7)).

18  
 19 After NAC, str and IT TILs were available in 192 (72%) and 120 (45%) patients respectively.  
 20 Post-NAC immune infiltration (whether intra-tumoral or stromal) was not significantly  
 21 different between *BRCA*-deficient and *BRCA*-proficient carriers (**Supplementary Table S1**,  
 22 **Fig. 3A-3E**). However, both str and IT TIL levels were significantly higher in tumors with

1 *BRCA* pathogenic mutations when compared with wild-type tumors in luminal BCs (median  
2 str TIL levels: 15% vs. 10%,  $p= 0.009$  and median IT TIL levels : 10% vs. 5%,  $p= 0.019$ ,  
3 respectively, **Supplementary Table S2, Figure 3**).

4 Median pre-NAC str TIL were higher than after NAC (20% vs 10%, 11.95%), also according  
5 to *BRCA* status and type (**Supplementary Table S1, Fig. 4**). There was no correlation  
6 between pre and post NAC str TILs (correlation coefficient of 0.13 and  $p < 0.06$ ,  
7 **Supplementary Fig. S5A**) and there was a weak, positive, linear relationship between pre  
8 and post NAC IT TIL levels (correlation coefficient of 0.31 and  $p < 0.001$ , **Supplementary**  
9 **Fig. S5B**).

#### 10 **Survival analysis**

11 After a median of follow-up of 90.4 months (range from 0.2 to 187 months), 73 patients  
12 experienced relapse, and 38 died. RFS and OS were not significantly different between  
13 carriers of a *BRCA* pathogenic variant and *BRCA*-proficient patients, neither were they in  
14 screened population nor after the subgroup analysis of BC subtype (**Supplementary Figs. S6-**  
15 **7**).



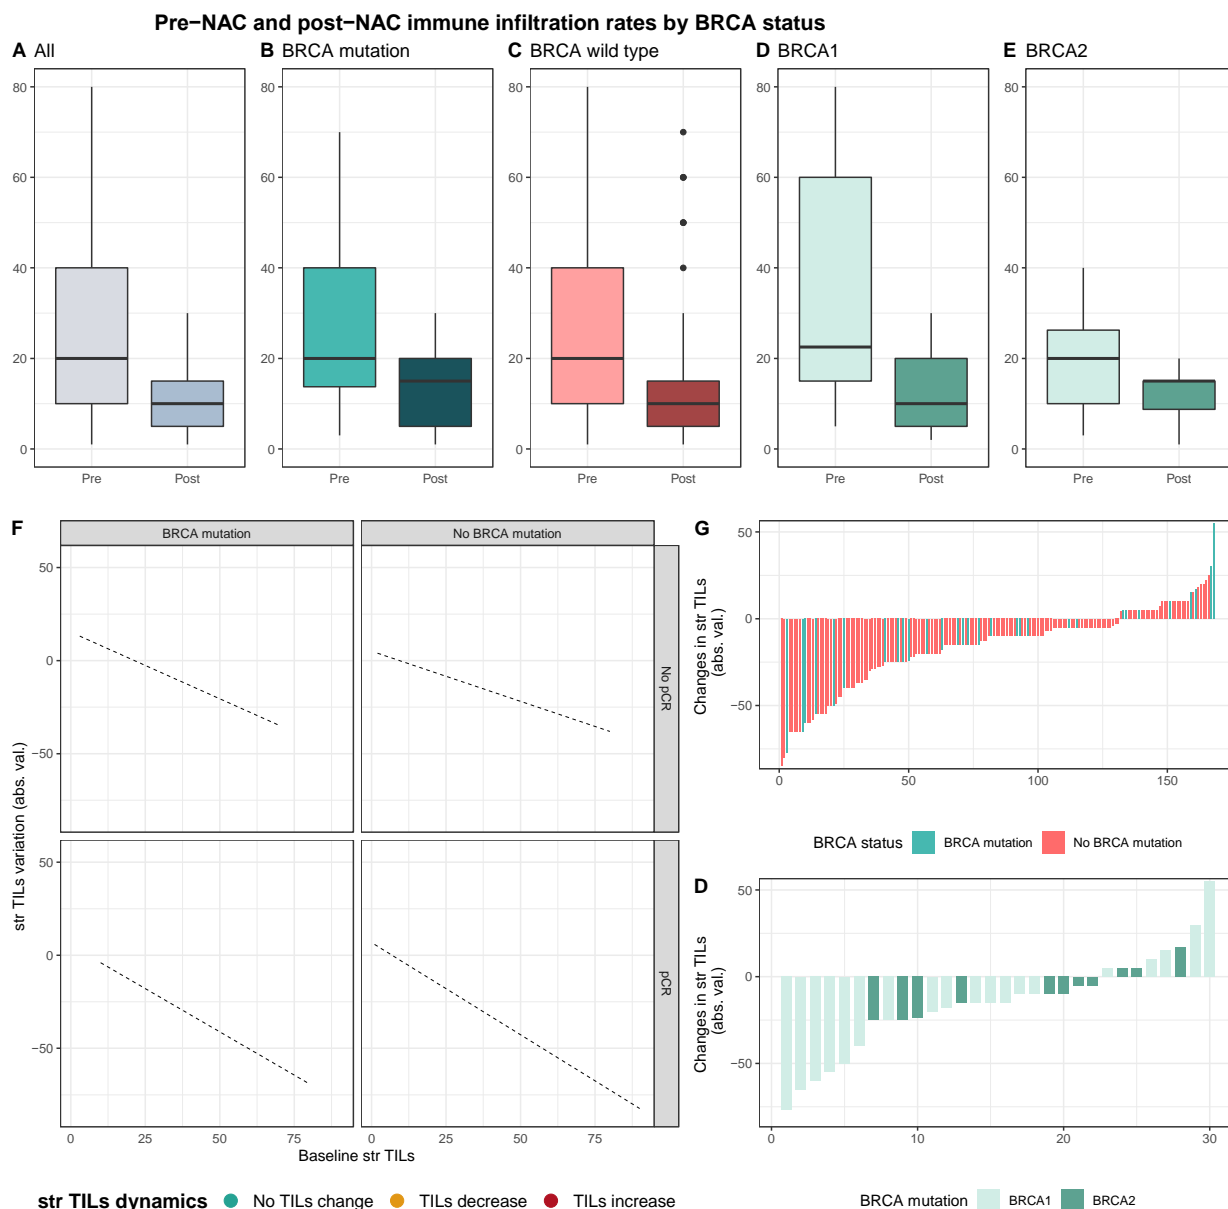

1 *BC patients with pre and post-NAC str TIL levels available [n=192; BRCA mutation (n= 36), BRCA wild type (n= 156), BRCA1 (n=24), BRCA2 (n=12) ]*

2 **Figure 4.** Pre-NAC and post-NAC stromal immune infiltration rates in the whole population and by BRCA status. **A-E**, bar plots of str TIL  
3 levels before and after NAC in the whole population and in *BRCA* pathogenic variant. Bottom and top bars of the boxplots represent the  
4 first and third quartiles, respectively, the medium bar is the median, and whiskers extend to 1.5 times the interquartile range. (All(n=192);  
5 *BRCA* mutation (n=36), *BRCA* wild-type(n=156); *BRCA1*(n=24), *BRCA2*(12)). **F**, variation of str TIL levels according to the pre-NAC str TIL  
6 levels binned by BRCA status and response to chemotherapy. Points represent the difference between pre- and post-NAC paired TIL levels  
7 values of a given patient and are colored according to TIL variation category (TIL level decrease: yellow/no change: green/increase: red)  
8 (All(n=191), *BRCA* mutation (n=36), *BRCA* wild-type(n=155)). **G-D**, waterfall plot representing the variation of TIL levels according to *BRCA*-  
9 deficient (*BRCA1*-deficient, *BRCA2*-deficient); each bar represents one sample, and samples are ranked by increasing order of TIL level  
10 change. Paired samples for which no change was observed have been removed from the graph. (All(n=191), *BRCA* mutation [(n=36),  
11 *BRCA1*, n= 24; *BRCA2*= 12)], *BRCA* wild-type(n=155)).

## 1 Discussion

2 In the current study, we did not identify any association between *BRCA* status and immune  
3 infiltration whatever the type of TILs (IT, str). We found a better response to neoadjuvant  
4 chemotherapy in tumors associated with a germline *BRCA* pathogenic variant when compared  
5 to *BRCA*-WT, but the latter was limited to the group of luminal BCs and was not statistically  
6 significant after multivariate analysis. Probably in relation, we recovered higher post-NAC  
7 lymphocyte infiltration in *BRCA*-deficient tumors in the luminal BC subgroup.

8 Regarding pre-treatment immune infiltration, S nderstrup and colleagues (25) analyzed str  
9 TIL levels in a nationwide cohort of *BRCA1* and *BRCA2* carriers with primary BCs. They  
10 found a greater prevalence of high stromal TILs (defined as TILs-positive tumors with  $\geq 60\%$   
11 str TILs) in *BRCA1*-deficient tumors (n=243) when compared with *BRCA2*-deficient tumors  
12 (n=168) (36% versus 15 % respectively,  $p < 0.0001$ ). However, no control group with *BRCA*-  
13 WT tumors was available in this study. In a small study of 85 TNBC patients, Solinas and  
14 colleagues (26) investigated the distribution of TILs subpopulations. The tumors of patients in  
15 the *BRCA1* or *BRCA2*-mutated group displayed a higher prevalence of TILs-positive tumors  
16 (defined as tumors with  $\geq 10\%$  str or IT TILs) when compared with the *BRCA*-WT (93.2%  
17 versus 75.6% respectively,  $p=0.037$ ). No other statistically significant differences were  
18 identified between *BRCA*-carriers and non-carriers, neither in TILs subpopulations nor their  
19 location. More recently, Telli and colleagues (27) investigated the association between TILs,  
20 homologous recombination deficiency (HDR) and *BRCA1/2* status in a cohort of 161 TNBC  
21 patients pooled from 5 phase II neoadjuvant clinical trials of platinum-based therapy. They  
22 found that IT TILs and str TILs density were not associated with *BRCA1/2* status ( $p=0.312$   
23 and  $p= 0.391$ , respectively). Consistently with Telli *et al*, we did not observe any difference  
24 in baseline immune infiltration according to *BRCA* status.

1 Some retrospective studies suggested that tumors displayed higher chemosensitivity  
2 according to *BRCA*-mutation status (17–19, 28–35). Arun *et al.* (31) compared pCR rates after  
3 NAC between *BRCA1* or *BRCA2*-carriers (n=57 and n=23, respectively) and WT controls  
4 (n=237). The majority of patients (82%) received an anthracycline-taxane containing regimen  
5 as NAC. The authors found that *BRCA1* mutation was an independent positive predictor of  
6 pCR (OR=3.16, 95%CI 1.55-6.42,  $p= 0.002$ ). In the largest study so far, Wunderle *et al.*(18)  
7 investigated efficacy of chemotherapy among a cohort of 355 patients composed with 16.6%  
8 (59/355) of *BRCA*-carriers. Across all BC subtypes, 64.4% of patients with a *BRCA1/2*  
9 pathogenic variant received anthracycline-based treatments, while the rest received  
10 carboplatin. pCR was observed in 54.3% (32/59) of all *BRCA1/2* mutation carriers, and in  
11 39.5% (15/34) of the *BRCA*-carriers *versus* 13% of the WT BCs in the anthracycline-regimen.  
12 In our cohort, we found similar results after univariate analysis, and we additionally  
13 evidenced a nearly significant interaction with BC subtype. The fact that our results were no  
14 longer significant after multivariate analysis is possibly due to a lack of statistical power.

15 Furthermore, we found that both str and IT TIL levels were higher after NAC completion in  
16 the luminal BCs. Whether this difference in post treatment TILs is a cause, a consequence, or  
17 unrelated to response to chemotherapy remains unknown. Indeed, post-NAC TIL levels have  
18 been shown to be strongly related to response to chemotherapy in BC cohorts including all  
19 BC subtypes (36–38) but only a few studies have investigated the dynamic of TIL levels in  
20 response to NAC. Hamy *et al.*(38) noticed that mean TIL levels decreased after chemotherapy  
21 completion across all the BC subtype (pre-NAC TILs: 24.1% vs. post-NAC TILs: 13.0%,  $p<$   
22 0.001). This decrease was strongly associated with high pCR rates, and the variation of TIL  
23 levels was strongly inversely correlated with pre-NAC TIL levels (and the variation of TIL  
24 levels was strongly inversely correlated with pre-NAC TIL levels ( $r= - 0.80$ ,  $p< 0.001$ ).

1 Finally, in line with several recently published clinical studies (39–41), we found that survival  
2 outcomes were not different between *BRCA*-carriers and non-carriers. A multivariate study,  
3 including 223 BC patients carrying *BRCA* pathogenic variants and 446 controls with sporadic  
4 BC matched for age and year of diagnosis, showed no difference in terms of specific BC  
5 survival between *BRCA1* or *BRCA2* mutation carriers and controls (42). Templeton et al.  
6 evaluated a total of 16 studies comprising data from 10,180 patients and concluded that *BRCA*  
7 pathogenic mutations were not associated with a worse overall survival (43).

8 Limits of our study include its retrospective design as well as small effectives potentially  
9 leading to a lack of statistical power. Moreover the incidence of bi-allelic pathogenic  
10 alterations in HR-related genes according to somatic origin is well-known and ranges from 1  
11 to 2 % (44) but we did not explore somatic mutational status in the tumor tissues in the  
12 current study.

13 It also has several strengths, for instance by being the largest cohort with a *BRCA*-WT control  
14 group, and analyses performed after stratification by BC subtype. Finally, to our knowledge,  
15 we provide data on post-NAC immune infiltration according to *BRCA* status for the first time.

16 Our study has several implications. First, it generates an unprecedented hypothesis that  
17 luminal BC patients with germline *BRCA* pathogenic variants may represent a subset of  
18 luminal BCs that are more likely to benefit from chemotherapy as primary treatment than the  
19 whole luminal BC population. It is known that the absolute benefit of chemotherapy is lower  
20 in luminal BC than in the other BC subtypes (45). If further validated in independent cohorts,  
21 our findings might lead to reconsider standard use of chemotherapy in patients with luminal  
22 BC associated with *BRCA* pathogenic mutations. Second, patients not achieving pCR may be  
23 candidates for post-operative clinical trials exploring alternative therapeutic strategies. As  
24 post-NAC immune infiltration seems to be higher in post-NAC specimens of luminal tumors

1 with *BRCA* pathogenic mutations, we can hypothesize that those tumors would be more likely  
2 to respond to checkpoint inhibitors after chemotherapy. Second line trials using immune  
3 checkpoint inhibitors (such as anti-PD-1 and anti-PD-L1 antibodies) alone or in combination,  
4 together with endocrine therapy could be a relevant strategy for patients failing to reach pCR  
5 at NAC completion.

**Table 2.** Literature Review. Abbreviations, CMF=cisplatin- methotrexate- fluorouracile ; AT=docetaxel-doxorubicine ; AC=doxorubicine-cyclophosphamide ; FAC=fluorouracile-doxorubicin-cyclophosphamide ; CEF=cyclophosphamide-epirubicine-fluorouracile ; A=anthracycline ; Dx=doxorubicine ; Do=docetaxel ; Cb=carboplatin ; Cis=cisplatin ; BEV=bevacizumab ; PTX=paclitaxel ; T=taxane.

| Study                                       | Setting /Design                                                            | Control group | Number of patient (n) | TNBC (n) | HER2-positive (n) | Luminal (n) | BRCA1 | BRCA2 | BRCA 1 and 2 | Chemotherapy regimen *                                                                        | sTILS evaluation | pCR BRCA-carriers vs non-carriers | in survival analyses | Comments                                                                                                                                                                                                                                                                                                                                                                                                                                                                                                                                                                                                                     |
|---------------------------------------------|----------------------------------------------------------------------------|---------------|-----------------------|----------|-------------------|-------------|-------|-------|--------------|-----------------------------------------------------------------------------------------------|------------------|-----------------------------------|----------------------|------------------------------------------------------------------------------------------------------------------------------------------------------------------------------------------------------------------------------------------------------------------------------------------------------------------------------------------------------------------------------------------------------------------------------------------------------------------------------------------------------------------------------------------------------------------------------------------------------------------------------|
| Chappuis (2002) Journal of Medical Genetics | Neoadjuvant Retrospective multicentric clinical trial                      | Yes           | 38                    | NA       | NA                | NA          | 7     | 4     | 0            | FAC<br>AC<br>CEF<br>AC+<br>AC + Do                                                            | No               | 44% vs 4%                         | No                   | pCR was achieved in 44% (4/11) of the BRCA-carriers and 4%(1/27) of the non-carriers (p=0.009). No survival analysis were experienced in this study.                                                                                                                                                                                                                                                                                                                                                                                                                                                                         |
| Byrski (2009) JCO                           | Neoadjuvant Epidemiologic retrospective cohort (nationwide)                | No            | 102                   | NA       | 6                 | NA          | 102   | 0     | 0            | CMF ; AT ; AC<br>FAC or Cis                                                                   | No               | 23.5%                             | No                   | pCR was achieved in 23.5% of 102 patients with a BRCA1 mutation who received NAC. Especially, a complete pCR was observed in 8% (2/25) with AT- regimen ( standard of care) compared to 83% (10/12) with cisplatin.                                                                                                                                                                                                                                                                                                                                                                                                          |
| Arun (2011) JCO                             | Neoadjuvant Epidemiologic retrospective cohort                             | Yes           | 317                   | 77       | 60                | NA          | 57    | 23    | 0            | A-single agent; AT or T-single-agent                                                          | No               | 46% vs 22%                        | Yes                  | pCR was achieved in 46% of BRCA1-carriers and 13% of BRCA2-carriers and 22% of BRCA non-carriers (<0.001). In the multivariate logistic model, BRCA1 status ( OR=1.96, p=.03) remained as independant significant predictors of a pCR. No significant difference in overall prognosis.                                                                                                                                                                                                                                                                                                                                       |
| Wang (2014) Annals of Oncology              | Neoadjuvant Epidemiologic retrospective cohort                             | Yes           | 652                   | 652      | 0                 | 0           | 52    | NA    | 0            | A-single agent; AT or T-single-agent                                                          | No               | 53.8% vs 29.7%                    | Yes                  | The pCR rate was 31.6% in the 652 patients who received NAC. BRCA1 carriers had a significantly higher pCR rate than non-carriers (BRCA1 carriers versus non-carriers, 53.8% versus 29.7%, P < 0.001). Among women treated with anthracycline with or without taxane regimens, the pCR rate was 57.1% for BRCA1 carriers, 29.0% for non-carriers (P < 0.001). The RFS was similar between BRCA1 carriers and non-carriers.                                                                                                                                                                                                   |
| Byrski (2014) BCRT                          | Neoadjuvant Epidemiologic prospective cohort                               | No            | 10                    | 10       | 0                 | 0           | 10    | 0     | 0            | Cis                                                                                           | No               | 90%                               | No                   | 90% (9/10) in BRCA1-mutated BC patients achieved a pCR after NAC with cisplatin chemotherapy.                                                                                                                                                                                                                                                                                                                                                                                                                                                                                                                                |
| Byrski (2015) HCCP                          | Neoadjuvant Epidemiologic prospective cohort                               | No            | 107                   | 82       | 2                 | NA          | 107   | 0     | 0            | Cis                                                                                           | No               | 61%                               | No                   | 61% (65/107) in BRCA1-mutated BC patients achieved pCR after NAC with cisplatin chemotherapy. In this study of BRCA1-mutation carriers, a pCR was also achieved in 56% of 16 patients with ER-positive BC. No survival analysis were experienced in the current study.                                                                                                                                                                                                                                                                                                                                                       |
| Paluch-Shimon (2016) BCRT                   | Neoadjuvant Epidemiologic retrospective cohort                             | Yes           | 80                    | 80       | 0                 | 0           | 34    | 0     | 0            | AT                                                                                            | No               | 68% vs 37%                        | Yes                  | The BRCA1-carriers had pCR rate of 68% compared with 37% among non-carriers, p = 0.01. Yet this did not translate into superior survival for BRCA1 carriers compared with non-carriers.                                                                                                                                                                                                                                                                                                                                                                                                                                      |
| Bignon (2017) Breast                        | Neoadjuvant Epidemiologic retrospective cohort                             | No            | 53                    | 53       | 0                 | 0           | 46    | 6     | 1            | A-single agent or AT                                                                          | No               | 66%                               | Yes                  | The pCR rate was 38.3% [95% CI, 26%-55%] among BRCA1 mutation carriers, and 66% among the 6 BRCA2 mutation carriers, 15 relapses and 6 second cancers were recorded during the follow-up period. 11 deaths occurred, all of which were in the non-pCR group. DFS (P < .01) and OS (P < .01) were significantly better in the pCR group than the non-pCR group.                                                                                                                                                                                                                                                               |
| Hahnhen (2017) JAMA oncology                | Neoadjuvant secondary analysis of the GeparSixto randomized clinical Trial | Yes           | 291                   | 291      | 0                 | 0           | 50    |       | 0            | AT + BEV +/- Cis                                                                              | No               | 66.7% vs 36.4%                    | Yes                  | Patients with BRCA-mutation did not derive a pCR benefit from the addition of carboplatine (65.4% vs 66.7%) compared to non-BRCA carriers (55% vs 36.4%). No significant difference in overall prognosis observed in the BRCA-mutated subgroup.                                                                                                                                                                                                                                                                                                                                                                              |
| Sharma (2017) CCR                           | Neoadjuvant prospective, multicenter, non-randomized trial                 | Yes           | 190                   | 190      | 0                 | 0           | 30    |       | 0            | Cb + Do                                                                                       | No               | 59% vs 56%                        | No                   | No significant difference in pCR between BRCA-carriers and WT TNBC (59% and 56%, respectively (p=0.83)). The Carboplatin-Docetaxel regimen was well tolerated and yielded high pCR rates in both BRCA associated and WT TNBC. These results are comparable to pCR of previous studies (who investigated pCR after NAC with addition of carboplatin to anthracycline-taxane chemotherapy in TNBC cohort).                                                                                                                                                                                                                     |
| Wunderle (2018) BCRT                        | Neoadjuvant Epidemiologic retrospective cohort                             | Yes           | 355                   | 138      | 58                | 159         | 43    | 16    | 0            | AT ; Cb                                                                                       | No               | 54.3% vs 12.6%                    | Yes                  | pCR was observed in 54.3% of BRCA1/2 mutation carriers, but only in 12.6% of non-carriers. The adjusted odds ratio was 2.48 (95% CI 1.26-4.91) for BRCA1/2 carriers versus non-carriers. No difference in overall survival was observed.                                                                                                                                                                                                                                                                                                                                                                                     |
| Saether (2018) HCCP                         | Neoadjuvant Epidemiologic retrospective cohort                             | No            | 12                    | NA       | NA                | NA          | 12    | 0     | 0            | Cis + Dx or Cb + Do                                                                           | No               | 83%                               | No                   | 11 patients received a combination of cisplatin and doxorubicin, and 1 patient received carboplatin and docetaxel. 83% (10/12) of the BRCA1-carriers achieved pCR. This results were comparable to existing results found in similar studies. No information about BC subtype among the study population and the toxicity of the chemotherapy was not evaluated.                                                                                                                                                                                                                                                             |
| Sella (2018) Breast                         | Neoadjuvant Epidemiologic retrospective cohort                             | Yes           | 43                    | 43       | 0                 | 0           | 14    | 0     | 0            | AT +/- Cb                                                                                     | No               | 67% vs 38%                        | No                   | pCR was achieved in 38% in BRCA WT compared to 67% in BRCA-associated TNBC (p = 0.232). No benefit from the addition of carboplatine in BRCA-carriers (64.3% v 67%) compared to non-BRCA carriers (44.8% v 38%) when compared to historic institutional rates with AT.                                                                                                                                                                                                                                                                                                                                                       |
| Telli (2019) CCR                            | 5 pooled analyses of phase II                                              | Yes           | 161                   | 161      | 0                 | 0           | 34    |       | 0            | Cb + gemcitabine + Irinaparib ; Cis ; Cis + BEV ; Cb + Eribulin ; Cb + nab-PTX +/- Vorinostat | Yes              | No                                | No                   | pCR was achieved in 51 (31.7%) patients. In patients with TNBC treated with neoadjuvant platinum-based therapy, iTIL and sTIL densities were not significantly associated with BRCA1/2-mutated tumor status (p=0.312 and p= 0.391). In multivariate analyses, sTIL density (OR 1.23, 95% CI 0.94-1.61, p=0.139) was not associated with pCR, but was associated with RCB OI status (OR 1.62, 95% CI 1.20-2.28, p=0.001).                                                                                                                                                                                                     |
| Solinas (2019) Cancer Letters               | Epidemiologic retrospective cohort                                         | Yes           | 85                    | 85       | 0                 | 0           | 38    | 6     | 0            | NA                                                                                            | Yes              | No                                | Yes                  | The BRCA-mutated tumors had a significantly higher incidence of TIL-positive levels compared to WT (44% and 41%, respectively p = 0.037). No significant difference between BRCA-mutated and WT groups neither in TIL subpopulation nor their location. No difference in i-DFS and OS after stratification on TIL infiltration levels.                                                                                                                                                                                                                                                                                       |
| Senderstrup (2019) Acta Oncologica          | Epidemiologic multicentric prospective cohort (nationwide)                 | No            | 411                   | NA       | 24                | NA          | 243   | 168   | 0            | NA                                                                                            | Yes              | No                                | Yes                  | High sTILs (defined as TILs>50%) were observed in 36% in BRCA1+ and 15% in BRCA2-mutated tumors (p<0.0001). Significant association with survival (OS and DFS) was observed in BRCA1 subgroup. sTILs are an important prognostic factor in BRCA BC and increasing sTILs is associated with a better prognosis.                                                                                                                                                                                                                                                                                                               |
| Our study (2020)                            | Epidemiologic prospective cohort                                           | Yes           | 267                   | 110      | 67                | 90          | 31    | 14    | 1            | A-single agent; AT or T-single-agent                                                          | Yes              | 45.7% vs 28.6%                    | Yes                  | Among the whole population, 84 tumors achieved a pCR (31.5%). After stratification by BC subtype, pCR rates were significantly higher in luminal BRCA-mutated BCs when compared with WT tumors ( 33.3% vs 5.4%, p=0.006). Pre and post-NAC str or IT TILs were not significantly different between BRCA-carriers and non-carriers in whole population. In the luminal BC, both str and IT post-NAC TIL levels were significantly higher in BRCA-mutated tumors when compared with WT tumors but was no longer significant after multivariate analysis. No difference in RFS or OS between BRCA-mutated and BRCA-WT patients. |

## 1 **References:**

- 2 1. Rastogi P, Anderson SJ, Bear HD, Geyer CE, Kahlenberg MS, Robidoux A, et al.  
3 Preoperative chemotherapy: updates of National Surgical Adjuvant Breast and Bowel  
4 Project Protocols B-18 and B-27. *J Clin Oncol Off J Am Soc Clin Oncol*. 2008;26:778–  
5 85.
- 6 2. Reyat F, Hamy AS, Piccart MJ. Neoadjuvant treatment: the future of patients with breast  
7 cancer. *ESMO Open*. 2018;3:e000371.
- 8 3. Luangdilok S, Samarnthai N, Korphaisarn K. Association between Pathological Complete  
9 Response and Outcome Following Neoadjuvant Chemotherapy in Locally Advanced  
10 Breast Cancer Patients. *J Breast Cancer*. 2014;17:376–85.
- 11 4. Huang K-L, Mashl RJ, Wu Y, Ritter DI, Wang J, Oh C, et al. Pathogenic Germline  
12 Variants in 10,389 Adult Cancers. *Cell*. 2018;173:355-370.e14.
- 13 5. Kuchenbaecker KB, Hopper JL, Barnes DR, Phillips K-A, Mooij TM, Roos-Blom M-J, et  
14 al. Risks of Breast, Ovarian, and Contralateral Breast Cancer for BRCA1 and BRCA2  
15 Mutation Carriers. *JAMA*. 2017;317:2402–16.
- 16 6. Ferreira EN, Brianese RC, de Almeida RVB, Drummond RD, de Souza JE, da Silva IT, et  
17 al. Influence of BRCA1 Germline Mutations in the Somatic Mutational Burden of Triple-  
18 Negative Breast Cancer. *Transl Oncol*. 2019;12:1453–60.
- 19 7. Eisinger F, Jacquemier J, Charpin C, Stoppa-Lyonnet D, Bressac-de Paillerets B, Peyrat  
20 JP, et al. Mutations at BRCA1: the medullary breast carcinoma revisited. *Cancer Res*.  
21 1998;58:1588–92.
- 22 8. Phillips KA. Immunophenotypic and pathologic differences between BRCA1 and BRCA2  
23 hereditary breast cancers. *J Clin Oncol Off J Am Soc Clin Oncol*. 2000;18:107S-12S.
- 24 9. Mavaddat N, Barrowdale D, Andrulis IL, Domchek SM, Eccles D, Nevanlinna H, et al.  
25 Pathology of breast and ovarian cancers among BRCA1 and BRCA2 mutation carriers:  
26 results from the Consortium of Investigators of Modifiers of BRCA1/2 (CIMBA). *Cancer*  
27 *Epidemiol Biomark Prev Publ Am Assoc Cancer Res Cosponsored Am Soc Prev Oncol*.  
28 2012;21:134–47.
- 29 10. Lakhani SR, Van De Vijver MJ, Jacquemier J, Anderson TJ, Osin PP, McGuffog L, et al.  
30 The pathology of familial breast cancer: predictive value of immunohistochemical  
31 markers estrogen receptor, progesterone receptor, HER-2, and p53 in patients with  
32 mutations in BRCA1 and BRCA2. *J Clin Oncol Off J Am Soc Clin Oncol*. 2002;20:2310–  
33 8.
- 34 11. Armes JE, Trute L, White D, Southey MC, Hammet F, Tesoriero A, et al. Distinct  
35 molecular pathogeneses of early-onset breast cancers in BRCA1 and BRCA2 mutation  
36 carriers: a population-based study. *Cancer Res*. 1999;59:2011–7.
- 37 12. Palacios J, Honrado E, Osorio A, Cazorla A, Sarrió D, Barroso A, et al. Phenotypic  
38 characterization of BRCA1 and BRCA2 tumors based in a tissue microarray study with  
39 37 immunohistochemical markers. *Breast Cancer Res Treat*. 2005;90:5–14.



- 1 13. Lakhani SR, Reis-Filho JS, Fulford L, Penault-Llorca F, van der Vijver M, Parry S, et al.  
2 Prediction of BRCA1 status in patients with breast cancer using estrogen receptor and  
3 basal phenotype. *Clin Cancer Res Off J Am Assoc Cancer Res*. 2005;11:5175–80.
- 4 14. Denkert C, Liedtke C, Tutt A, von Minckwitz G. Molecular alterations in triple-negative  
5 breast cancer-the road to new treatment strategies. *Lancet Lond Engl*. 2017;389:2430–42.
- 6 15. Mancini P, Angeloni A, Risi E, Orsi E, Mezi S. Standard of Care and Promising New  
7 Agents for Triple Negative Metastatic Breast Cancer. *Cancers*. 2014;6:2187–223.
- 8 16. Godet I, Gilkes DM. BRCA1 and BRCA2 mutations and treatment strategies for breast  
9 cancer. *Integr Cancer Sci Ther [Internet]*. 2017 [cited 2019 Dec 17];4. Available from:  
10 <https://www.ncbi.nlm.nih.gov/pmc/articles/PMC5505673/>
- 11 17. Byrski T, Gronwald J, Huzarski T, Grzybowska E, Budryk M, Stawicka M, et al.  
12 Pathologic Complete Response Rates in Young Women With BRCA1-Positive Breast  
13 Cancers After Neoadjuvant Chemotherapy. *J Clin Oncol*. 2009;28:375–9.
- 14 18. Wunderle M, Gass P, Häberle L, Flesch VM, Rauh C, Bani MR, et al. BRCA mutations  
15 and their influence on pathological complete response and prognosis in a clinical cohort  
16 of neoadjuvantly treated breast cancer patients. *Breast Cancer Res Treat*. 2018;171:85–94.
- 17 19. Sella T, Gal Yam EN, Levanon K, Rotenberg TS, Gadot M, Kuchuk I, et al. Evaluation of  
18 tolerability and efficacy of incorporating carboplatin in neoadjuvant anthracycline and  
19 taxane based therapy in a BRCA1 enriched triple-negative breast cancer cohort. *Breast*  
20 *Edinb Scotl*. 2018;40:141–6.
- 21 20. Solinas C, Ceppi M, Lambertini M, Scartozzi M, Buisseret L, Garaud S, et al. Tumor-  
22 infiltrating lymphocytes in patients with HER2-positive breast cancer treated with  
23 neoadjuvant chemotherapy plus trastuzumab, lapatinib or their combination: A meta-  
24 analysis of randomized controlled trials. *Cancer Treat Rev*. 2017;57:8–15.
- 25 21. Solinas C, Carbognin L, De Silva P, Criscitiello C, Lambertini M. Tumor-infiltrating  
26 lymphocytes in breast cancer according to tumor subtype: Current state of the art. *Breast*  
27 *Edinb Scotl*. 2017;35:142–50.
- 28 22. [Recommendations for the immunohistochemistry of the hormonal receptors on paraffin  
29 sections in breast cancer. Update 1999. Group for Evaluation of Prognostic Factors using  
30 Immunohistochemistry in Breast Cancer (GEFPICS-FNCLCC)]. *Ann Pathol*.  
31 1999;19:336–43.
- 32 23. Salgado R, Denkert C, Demaria S, Sirtaine N, Klauschen F, Pruneri G, et al. The  
33 evaluation of tumor-infiltrating lymphocytes (TILs) in breast cancer: recommendations by  
34 an International TILs Working Group 2014. *Ann Oncol Off J Eur Soc Med Oncol*.  
35 2015;26:259–71.
- 36 24. Dieci MV, Radosevic-Robin N, Fineberg S, van den Eynden G, Ternes N, Penault-Llorca  
37 F, et al. Update on tumor-infiltrating lymphocytes (TILs) in breast cancer, including  
38 recommendations to assess TILs in residual disease after neoadjuvant therapy and in  
39 carcinoma in situ: A report of the International Immuno-Oncology Biomarker Working  
40 Group on Breast Cancer. *Semin Cancer Biol*. 2018;52:16–25.



- 1 25. Sønderstrup IMH, Jensen MB, Ejlersen B, Eriksen JO, Gerdes AM, Kruse TA, et al.  
2 Evaluation of tumor-infiltrating lymphocytes and association with prognosis in BRCA-  
3 mutated breast cancer. *Acta Oncol Stockh Swed*. 2019;58:363–70.
- 4 26. Solinas C, Marcoux D, Garaud S, Vitória JR, Van den Eynden G, de Wind A, et al.  
5 BRCA gene mutations do not shape the extent and organization of tumor infiltrating  
6 lymphocytes in triple negative breast cancer. *Cancer Lett*. 2019;450:88–97.
- 7 27. Telli ML, Chu C, Badve SS, Vinayak S, Silver DP, Isakoff SJ, et al. Association of  
8 Tumor Infiltrating Lymphocytes with Homologous Recombination Deficiency and  
9 BRCA1/2 Status in Patients with Early Triple-Negative Breast Cancer: A Pooled  
10 Analysis. *Clin Cancer Res Off J Am Assoc Cancer Res*. 2019;
- 11 28. Chappuis P, Goffin J, Wong N, Perret C, Ghadirian P, Tonin P, et al. A significant  
12 response to neoadjuvant chemotherapy in BRCA1/2 related breast cancer. *J Med Genet*.  
13 2002;39:608–10.
- 14 29. Byrski T, Huzarski T, Dent R, Marczyk E, Jasiowka M, Gronwald J, et al. Pathologic  
15 complete response to neoadjuvant cisplatin in BRCA1-positive breast cancer patients.  
16 *Breast Cancer Res Treat*. 2014;147:401–5.
- 17 30. Byrski T, Huzarski T, Dent R, Marczyk E, Jasiowka M, Gronwald J, et al. Pathological  
18 complete response to neoadjuvant cisplatin in BRCA1-positive breast cancer patients.  
19 *Hered Cancer Clin Pract*. 2015;13:A8.
- 20 31. Arun B, Bayraktar S, Liu DD, Gutierrez Barrera AM, Atchley D, Pusztai L, et al.  
21 Response to Neoadjuvant Systemic Therapy for Breast Cancer in BRCA Mutation  
22 Carriers and Noncarriers: A Single-Institution Experience. *J Clin Oncol*. 2011;29:3739–  
23 46.
- 24 32. Silver DP, Richardson AL, Eklund AC, Wang ZC, Szallasi Z, Li Q, et al. Efficacy of  
25 neoadjuvant Cisplatin in triple-negative breast cancer. *J Clin Oncol Off J Am Soc Clin*  
26 *Oncol*. 2010;28:1145–53.
- 27 33. Paluch-Shimon S, Cardoso F, Sessa C, Balmana J, Cardoso MJ, Gilbert F, et al.  
28 Prevention and screening in BRCA mutation carriers and other breast/ovarian hereditary  
29 cancer syndromes: ESMO Clinical Practice Guidelines for cancer prevention and  
30 screening†. *Ann Oncol*. 2016;27:v103–10.
- 31 34. Hahnen E, Lederer B, Hauke J, Loibl S, Kröber S, Schneeweiss A, et al. Germline  
32 Mutation Status, Pathological Complete Response, and Disease-Free Survival in Triple-  
33 Negative Breast Cancer. *JAMA Oncol*. 2017;3:1378–85.
- 34 35. Sæther NH, Skuja E, Irmejs A, Maksimenko J, Miklasevics E, Purkalne G, et al.  
35 Platinum-based neoadjuvant chemotherapy in BRCA1-positive breast cancer: a  
36 retrospective cohort analysis and literature review. *Hered Cancer Clin Pract [Internet]*.  
37 2018 [cited 2019 Oct 27];16. Available from:  
38 <https://www.ncbi.nlm.nih.gov/pmc/articles/PMC5924493/>
- 39 36. Ali HR, Dariush A, Provenzano E, Bardwell H, Abraham JE, Iddawela M, et al.  
40 Computational pathology of pre-treatment biopsies identifies lymphocyte density as a

- 1 predictor of response to neoadjuvant chemotherapy in breast cancer. *Breast Cancer Res*  
2 *BCR*. 2016;18:21.
- 3 37. Ali HR, Dariush A, Thomas J, Provenzano E, Dunn J, Hiller L, et al. Lymphocyte density  
4 determined by computational pathology validated as a predictor of response to  
5 neoadjuvant chemotherapy in breast cancer: secondary analysis of the ARTemis trial. *Ann*  
6 *Oncol Off J Eur Soc Med Oncol*. 2017;28:1832–5.
- 7 38. Hamy A-S, Bonsang-Kitzis H, De Croze D, Laas E, Darrigues L, Topciu L, et al.  
8 Interaction between Molecular Subtypes and Stromal Immune Infiltration before and after  
9 Treatment in Breast Cancer Patients Treated with Neoadjuvant Chemotherapy. *Clin*  
10 *Cancer Res Off J Am Assoc Cancer Res*. 2019;25:6731–41.
- 11 39. Yadav S, Ladkany R, Yadav D, Alhalabi O, Khaddam S, Isaac D, et al. Impact of BRCA  
12 Mutation Status on Survival of Women With Triple-negative Breast Cancer. *Clin Breast*  
13 *Cancer*. 2018;18:e1229–35.
- 14 40. Xie Y, Gou Q, Wang Q, Zhong X, Zheng H. The role of BRCA status on prognosis in  
15 patients with triple-negative breast cancer. *Oncotarget*. 2017;8:87151–62.
- 16 41. Copson ER, Maishman TC, Tapper WJ, Cutress RI, Greville-Heygate S, Altman DG, et  
17 al. Germline BRCA mutation and outcome in young-onset breast cancer (POSH): a  
18 prospective cohort study. *Lancet Oncol*. 2018;19:169–80.
- 19 42. Brekelmans CTM, Tilanus-Linthorst MMA, Seynaeve C, vd Ouweland A, Menke-  
20 Pluymers MBE, Bartels CCM, et al. Tumour characteristics, survival and prognostic  
21 factors of hereditary breast cancer from BRCA2-, BRCA1- and non-BRCA1/2 families as  
22 compared to sporadic breast cancer cases. *Eur J Cancer Oxf Engl 1990*. 2007;43:867–76.
- 23 43. Templeton AJ, Gonzalez LD, Vera-Badillo FE, Tibau A, Goldstein R, Šeruga B, et al.  
24 Interaction between Hormonal Receptor Status, Age and Survival in Patients with  
25 BRCA1/2 Germline Mutations: A Systematic Review and Meta-Regression. *PloS One*.  
26 2016;11:e0154789.
- 27 44. Riaz N, Blecua P, Lim RS, Shen R, Higginson DS, Weinhold N, et al. Pan-cancer analysis  
28 of bi-allelic alterations in homologous recombination DNA repair genes. *Nat Commun*.  
29 2017;8:857.
- 30 45. Cardoso F, Kyriakides S, Ohno S, Penault-Llorca F, Poortmans P, Rubio IT, et al. Early  
31 breast cancer: ESMO Clinical Practice Guidelines for diagnosis, treatment and follow-  
32 up†. *Ann Oncol Off J Eur Soc Med Oncol*. 2019;30:1194–220.

33

## **Supplementary material**

### **1. Patients and treatments**

#### **1.1. Patients**

In total, patients with T1-3NxM0 invasive breast cancer (BC) (NEOREP Cohort, CNIL declaration number 1547270) treated at Institut Curie (Paris and Saint Cloud) between 2002 and 2012 were included in this study. We included unilateral, non-recurrent, non-inflammatory, non-metastatic tumors, excluding T4 tumors. NAC regimens changed over time (anthracycline-based regimen or sequential anthracycline-taxane regimen) with trastuzumab used in an adjuvant and/or neoadjuvant setting since 2005 for *HER2*-positive tumors. All patients underwent radiotherapy. Endocrine therapy (tamoxifen or aromatase inhibitor) was prescribed when indicated. This study was approved by the Breast Cancer Study Group of Institut Curie.

#### **1.2. Treatments**

NAC regimens changed over time (anthracycline-based regimen or sequential anthracycline-taxane regimen), with trastuzumab used in an adjuvant and/or neoadjuvant setting for *HER2*-positive tumors since the middle of the past decade. Trastuzumab treatments change over time due to a change of marketing authorization during the study period. Adjuvant hormone therapy (tamoxifen, aromatase inhibitor, or GnRH agonist) was prescribed when indicated. Surgery (breast-conserving or mastectomy) was performed 4-6 weeks after NAC. Every patient received adjuvant radiotherapy. Adjuvant chemotherapy (ADJ) was decided after multidisciplinary consultation meeting considering patient characteristic, prognosis factor and response to NAC (residual disease and/or node involvement). Patient follow-up after treatment was of every 4 months during the first 2 years, then every 6 months for 3 years, and

once a year starting from the 5<sup>th</sup> year. Follow-up consisted of clinical examination associated to mammography and mammary ultrasound once a year, with annual Magnetic resonance imaging (RMI) in *BRCA*-carriers.

## **2. Tumor samples and pathological review**

### **2.1. ER, PR, *HER2* status and BC subtype**

Cases were considered to be estrogen receptor (ER)-positive or progesterone receptor (PR)-positive if at least 10% of the tumor cells expressed estrogen and/or progesterone receptors (ER/PR). *HER2* expression was determined by immunohistochemistry, with scoring according to the American Society of Clinical Oncology (ASCO)/College of American Pathologists (CAP) guidelines (1). Scores of 3+ were reported as positive, and scores of 1+/0 as negative. Tumors with scores of 2+ were further tested by fluorescence *in situ* hybridization (FISH). For *HER2* gene amplification, we evaluated a mean of 40 tumor cells per sample and calculated the mean *HER2* signal per nucleus. A *HER2*/CEN17 ratio  $\geq 2$  was considered positive, and a ratio  $< 2$  was considered negative (1).

### **2.2. Other pathological parameters**

Histological grade was determined as described by Elston Ellis. Mitotic cells were counted on 10 high-power fields (HPF) (x40 objective; field diameter = 0.62 mm) and cutoffs of <11, 12–22 and >22 mitoses were used to define low, intermediate and high mitotic indices, respectively, according to the international recommendations(2). Due to significant differences in distribution before and after NAC, invasive tumor cellularity was binned according to the median value (pre-NAC: 60%; post-NAC: 30%).

### **2.3 *BRCA* status**

Since 2002, patient referral for genetic counseling depends on individual or family criteria. These criteria are based on the probability of identifying a genetic predisposition in the family of at least 10% (in particular a germline *BRCA1* or *BRCA 2* pathogenic variant). The individual criteria are: early age at diagnosis (under 40) or bilateral breast cancer: synchronous or metachronous (with the first breast cancer before age 50), or specific phenotype (triple negative cancer before age 51). The family criteria are: 3 cases of breast cancer in the same branch of heredity, or 2 cases of breast cancer including 1 under 45-50, of breast or ovarian cancer, or 2 cases of breast cancer including 1 male. The 2 cases are women relatives of the first degree (or second degree if paternal transmission).

#### **2.4 TILs levels**

Infiltrates were scored on a continuous scale, as the mean percentage of the stromal area occupied by mononuclear cells. After NAC, we assessed TIL levels within the borders of the residual tumor bed, as defined by the RCB index(3). Nothing is known about the clinical, biological and prognostic significance of TILs in the area of regression in cases of pathological response, but the TILs international working group recently called for their evaluation for research purposes. In cases of pCR, the scar area was measured on macroscopic examination. The scar appeared as a white area in the breast parenchyma corresponding to the tumor bed modified by NAC. It was characterized by the presence of histiocytes, lymphocytes, macrophages, fibrosis and elastosis. The whole fibro-inflammatory scar was evaluated on HE sections (size in mm and stromal TIL level evaluation).

## References

1. Wolff AC, Hammond MEH, Schwartz JN, Hagerty KL, Allred DC, Cote RJ, et al. American Society of Clinical Oncology/College of American Pathologists guideline recommendations for human epidermal growth factor receptor 2 testing in breast cancer. *J Clin Oncol*. 2007;25:118–45.
2. WHO Classification of Tumours of the Breast. Fourth Edition - WHO - OMS - [Internet]. [cited 2018 Feb 9]. Available from: <http://apps.who.int/bookorders/WHP/detart1.jsp?sesslan=1&codlan=1&codcol=70&codch=4004>
3. Symmans WF, Peintinger F, Hatzis C, Rajan R, Kuerer H, Valero V, et al. Measurement of residual breast cancer burden to predict survival after neoadjuvant chemotherapy. *J Clin Oncol Off J Am Soc Clin Oncol*. 2007;25:4414–22.

## Supplementary Tables

| Supplementary Table S1. BRCA screened patients' characteristics among by BRCA status |            |                  |                  |                  |       |
|--------------------------------------------------------------------------------------|------------|------------------|------------------|------------------|-------|
| Characteristics                                                                      | Class      | Overall          | BRCA mutation    | BRCA wild-type   | p     |
| n=                                                                                   |            | 267 (100%)       | 46 (17%)         | 221 (83%)        |       |
| Age (mean)                                                                           |            | 41.31            | 39.5             | 41.7             | 0.15  |
| Menopausal status                                                                    | pre        | 228 (85.7%)      | 41 (89.1%)       | 187 (85.0%)      | 0.62  |
|                                                                                      | post       | 38 (14.3%)       | 5 (10.9%)        | 33 (15.0%)       |       |
| BMI (mean)                                                                           |            | 23.50            | 22.8             | 23.6             | 0.24  |
| BMI class                                                                            | [15,19]    | 23 (8.6%)        | 6 (13.3%)        | 17 (7.7%)        | 0.248 |
|                                                                                      | (19,25]    | 178 (66.9%)      | 31 (68.9%)       | 147 (66.5%)      |       |
|                                                                                      | (25,30]    | 47 (17.7%)       | 4 (8.9%)         | 43 (19.5%)       |       |
|                                                                                      | (30,50]    | 18 (6.8%)        | 4 (8.9%)         | 14 (6.3%)        |       |
| Family history of BC                                                                 | no         | 116 (43.9%)      | 12 (26.1%)       | 104 (47.7%)      | 0.01  |
|                                                                                      | yes        | 148 (56.1%)      | 34 (73.9%)       | 114 (52.3%)      |       |
| Clinical tumor size                                                                  | T1         | 27 (10.1%)       | 5 (10.9%)        | 22 (10.0%)       | 0.50  |
|                                                                                      | T2         | 181 (67.8%)      | 28 (60.9%)       | 153 (69.2%)      |       |
|                                                                                      | T3         | 59 (22.1%)       | 13 (28.3%)       | 46 (20.8%)       |       |
| Clinical nodal status                                                                | N0         | 110 (41.2%)      | 17 (37.0%)       | 93 (42.1%)       | 0.63  |
|                                                                                      | N1-N2-N3   | 157 (58.8%)      | 29 (63.0%)       | 128 (57.9%)      |       |
| Histology                                                                            | NST        | 256 (95.9%)      | 43 (93.5%)       | 213 (96.4%)      | NaN   |
|                                                                                      | others     | 11 (4.1%)        | 3 (6.5%)         | 8 (3.6%)         |       |
| Grade                                                                                | I-II       | 86 (32.8%)       | 10 (23.3%)       | 76 (34.7%)       | 0.24  |
|                                                                                      | III        | 176 (67.2%)      | 33 (76.7%)       | 143 (65.3%)      |       |
| Mitotic Index (mean)                                                                 |            | 26.57            | 30.8             | 25.6             | 0.24  |
| Subtype                                                                              | luminal    | 90 (33.7%)       | 15 (32.6%)       | 75 (33.9%)       | <0.01 |
|                                                                                      | TNBC       | 110 (41.2%)      | 27 (58.7%)       | 83 (37.6%)       |       |
|                                                                                      | HER2       | 67 (25.1%)       | 4 (8.7%)         | 63 (28.5%)       |       |
| str TILs (mean)                                                                      |            | 20.0 [10.0-40.0] | 20.0 [13.8-40.0] | 20.0 [10.0-40.0] | 0,78  |
| IT TILs (mean)                                                                       |            | 5.0 [5.0-15.0]   | 5.0 [5.0-11.3]   | 7.5 [5.0-20.0]   | 0,72  |
| NAC Regimen                                                                          | AC         | 29 (10.9%)       | 4 (8.7%)         | 25 (11.4%)       | 0.49  |
|                                                                                      | AC-Taxanes | 221 (83.1%)      | 41 (89.1%)       | 180 (81.8%)      |       |
|                                                                                      | Taxanes    | 7 (2.6%)         | 1 (2.2%)         | 6 (2.7%)         |       |
|                                                                                      | Others     | 9 (3.4%)         | 0 (0.0%)         | 9 (4.1%)         |       |
| <hr/>                                                                                |            |                  |                  |                  |       |
| pCR class                                                                            | No pCR     | 182 (68.4%)      | 25 (54.3%)       | 157 (71.4%)      | 0,04  |
|                                                                                      | pCR        | 84 (31.6%)       | 21 (45.7%)       | 63 (28.6%)       |       |
| Nodal involmnet                                                                      | 0          | 176 (66.2%)      | 35 (76.1%)       | 141 (64.1%)      | 0,16  |
|                                                                                      | 1-3        | 64 (24.1%)       | 6 (13.0%)        | 58 (26.4%)       |       |
|                                                                                      | ≥4         | 26 (9.8%)        | 5 (10.9%)        | 21 (9.5%)        |       |
| str TILs (mean)                                                                      |            | 10.0 [5.0-15.0]  | 15.0 [5.0-20.0]  | 10.0 [5.0-15.0]  | 0,14  |
| IT TILs (mean)                                                                       |            | 5.0 [2.0-10.0]   | 5.0 [4.3-10.0]   | 5.0 [2.0-10.0]   | 0,27  |

Missing data: Menopausal status, n=1; BMI (continuous), n=1; BMI class, n=1; Family history, n=3; Grade, n=5; Mitotic index, n=77; Pre-NAC str TILs, n=75; Pre-NAC IT TILs, n=75; NAC regimen, n=1; pCR status, n=1; Post-NAC Nodal involmnet, n=1; Post-NAC str TILs, n=75; Post-NAC IT TILs, n=147.

NAC=neoadjuvant chemotherapy ; BMI=body mass index; NST= no special type ; TNBC= triple negative breast cancer ; str TILs= stromal tumor-infiltrating lymphocytes ; IT TILs= intratumoral-infiltrating lymphocytes; AC=anthracyclines; pCR=Pathologic complete response.

The "n" denotes the number of patients. In case of categorical variables, percentages are expressed between brackets. In case of continuous variables, mean value is reported. In case of nonnormal continuous variables, median value is reported, with interquartile range between brackets.

Supplementary Table S2. Patients' characteristics in each tumor subtype and by BRCA status

| Characteristics       | Class      | Luminal          |                  |       | TNBC             |                  |       | HER2             |                  |       |
|-----------------------|------------|------------------|------------------|-------|------------------|------------------|-------|------------------|------------------|-------|
|                       |            | BRCA mutation    | BRCA wild-type   | p     | BRCA mutation    | BRCA wild-type   | p     | BRCA mutation    | BRCA wild-type   | p     |
| n=                    |            | 15 (16.7%)       | 75 (83.3%)       |       | 27 (24.5%)       | 83 (75.5%)       |       | 4 (6.0%)         | 63 (94.0%)       |       |
| Age (mean)            |            | 38.5             | 42.3             | 0,13  | 39.6             | 42.2             | 0,19  | 43.5             | 40.2             | 0,50  |
| Menopausal status     | pre        | 14 (93.3%)       | 64 (86.5%)       | 0,76  | 24 (88.9%)       | 72 (86.7%)       | 1,00  | 3 (75.0%)        | 51 (81.0%)       | 1,00  |
|                       | post       | 1 (6.7%)         | 10 (13.5%)       |       | 3 (11.1%)        | 11 (13.3%)       |       | 1 (25.0%)        | 12 (19.0%)       |       |
| BMI (mean)            |            | 22.2             | 23.5             | 0,32  | 23.5             | 23.3             | 0,74  | 20.4             | 24.3 (4.4%)      | 0,09  |
| BMI class             | [15,19]    | 4 (28.6%)        | 7 (9.3%)         | 0,204 | 1 (3.7%)         | 7 (8.4%)         | 0,251 | 1 (25.0%)        | 3 (4.8%)         | 0,298 |
|                       | (19,25]    | 8 (57.1%)        | 49 (65.3%)       |       | 20 (74.1%)       | 55 (66.3%)       |       | 3 (75.0%)        | 43 (68.3%)       |       |
|                       | (25,30]    | 1 (7.1%)         | 14 (18.7%)       |       | 3 (11.1%)        | 18 (21.7%)       |       | 0 (0.0%)         | 11 (17.5%)       |       |
|                       | (30,50]    | 1 (7.1%)         | 5 (6.7%)         |       | 3 (11.1%)        | 3 (3.6%)         |       | 0 (0.0%)         | 6 (9.5%)         |       |
| Family history        | no         | 2 (13.3%)        | 26 (35.1%)       | 0,18  | 10 (37.0%)       | 46 (56.1%)       | 0,13  | 0 (0.0%)         | 32 (51.6%)       | 0,14  |
|                       | yes        | 13 (86.7%)       | 48 (64.9%)       |       | 17 (63.0%)       | 36 (43.9%)       |       | 4 (100.0%)       | 30 (48.4%)       |       |
| Clinical tumor size   | T1         | 1 (6.7%)         | 5 (6.7%)         | 0,99  | 2 (7.4%)         | 11 (13.3%)       | 0,28  | 2 (50.0%)        | 6 (9.5%)         | 0,04  |
|                       | T2         | 11 (73.3%)       | 54 (72.0%)       |       | 16 (59.3%)       | 56 (67.5%)       |       | 1 (25.0%)        | 43 (68.3%)       |       |
|                       | T3         | 3 (20.0%)        | 16 (21.3%)       |       | 9 (33.3%)        | 16 (19.3%)       |       | 1 (25.0%)        | 14 (22.2%)       |       |
| Clinical nodal status | N0         | 5 (33.3%)        | 35 (46.7%)       | 0,51  | 10 (37.0%)       | 34 (41.0%)       | 0,89  | 2 (50.0%)        | 24 (38.1%)       | 1,00  |
|                       | N1-N2-N3   | 10 (66.7%)       | 40 (53.3%)       |       | 17 (63.0%)       | 49 (59.0%)       |       | 2 (50.0%)        | 39 (61.9%)       |       |
| Histology             | NST        | 13 (86.7%)       | 72 (96.0%)       | NaN   | 26 (96.3%)       | 78 (94.0%)       | NaN   | 4 (100.0%)       | 63 (100.0%)      | NaN   |
|                       | others     | 2 (13.3%)        | 3 (4.0%)         |       | 1 (3.7%)         | 5 (6.0%)         |       | 0 (0.0%)         | 0 (0.0%)         |       |
| Grade                 | I-II       | 6 (42.9%)        | 42 (56.0%)       | 0,55  | 2 (8.0%)         | 10 (12.2%)       | 0,53  | 2 (50.0%)        | 24 (38.7%)       | NaN   |
|                       | III        | 8 (57.1%)        | 33 (44.0%)       |       | 23 (92.0%)       | 72 (87.8%)       |       | 2 (50.0%)        | 38 (61.3%)       |       |
| Mitotic Index (mean)  |            | 23.0             | 18.5             | 0,56  | 36.3             | 31.8             | 0,46  | 13.0             | 21.5             | 0,45  |
| str TILs (mean)       |            | 12.5 [8.8-15.0]  | 15.0 [10.0-25.0] | 0,17  | 27.5 [15.0-60.0] | 30.0 [15.0-50.0] | 0,71  | 22.5 [20.0-28.8] | 20.0 [10.0-35.0] | 0,66  |
| IT TILs (mean)        |            | 5.0 [4.3-6.3]    | 10.0 [5.0-15.0]  | 0,07  | 5.0 [5.0-15.0]   | 5.0 [2.0-15.0]   | 0,37  | 15.0 [10.0-20.0] | 15.0 [5.0-20.0]  | 0,77  |
| NAC Regimen           | AC         | 3 (20.0%)        | 13 (17.6%)       | 0,83  | 1 (3.7%)         | 9 (10.8%)        | NaN   | 0 (0.0%)         | 3 (4.8%)         | 0,77  |
|                       | AC-Taxanes | 11 (73.3%)       | 58 (78.4%)       |       | 26 (96.3%)       | 73 (88.0%)       |       | 4 (100.0%)       | 49 (77.8%)       |       |
|                       | Taxanes    | 1 (6.7%)         | 2 (2.7%)         |       | 0 (0.0%)         | 0 (0.0%)         |       | 0 (0.0%)         | 4 (6.3%)         |       |
|                       | Others     | 0 (0.0%)         | 1 (1.4%)         |       | 0 (0.0%)         | 1 (1.2%)         |       | 0 (0.0%)         | 7 (11.1%)        |       |
| pCR class             | No pCR     | 10 (66.7%)       | 70 (94.6%)       | <0,01 | 14 (51.9%)       | 47 (56.6%)       | 0,83  | 1 (25.0%)        | 40 (63.5%)       | 0,32  |
|                       | pCR        | 5 (33.3%)        | 4 (5.4%)         |       | 13 (48.1%)       | 36 (43.4%)       |       | 3 (75.0%)        | 23 (36.5%)       |       |
| Nodal involvement     | 0          | 8 (53.3%)        | 30 (40.5%)       | 0,23  | 23 (85.2%)       | 65 (78.3%)       | 0,74  | 4 (100.0%)       | 46 (73.0%)       | 0,49  |
|                       | 1-3        | 3 (20.0%)        | 32 (43.2%)       |       | 3 (11.1%)        | 13 (15.7%)       |       | 0 (0.0%)         | 13 (20.6%)       |       |
|                       | ≥4         | 4 (26.7%)        | 12 (16.2%)       |       | 1 (3.7%)         | 5 (6.0%)         |       | 0 (0.0%)         | 4 (6.3%)         |       |
| str TILs (mean)       |            | 15.0 [13.8-20.0] | 10.0 [5.0-10.0]  | <0,01 | 10.0 [5.0-20.0]  | 10.0 [5.0-25.0]  | 0,82  | 10.0 [4.3-15.0]  | 10.0 [5.0-12.5]  | 0,95  |
| IT TILs (mean)        |            | 10.0 [5.0-12.5]  | 5.0 [3.0-5.0]    | 0,02  | 5.0 [1.8-6.3]    | 5.0 [3.0-10.0]   | 0,54  | 5.0 [5.0-5.0]    | 5.0 [2.0-5.0]    | 0,68  |

Missing data: Menopausal status, n=1; BMI (continuous), n=1; BMI class, n=1; Family history, n=3; Grade, n=5; Mitotic index, n=77; Pre-NAC str TILs, n=75; Pre-NAC IT TILs, n=75; NAC regimen, n=1; pCR status, n=1; Post-NAC Nodal involvement, n=1; Post-NAC str TILs, n=75; Post-NAC IT TILs, n=147.

NAC=neoadjuvant chemotherapy; BMI=body mass index; NST=no special type; TNBC=triple negative breast cancer; str TILs=stromal tumor-infiltrating lymphocytes; IT TILs=intratymoral-infiltrating lymphocytes; AC=anthracyclines; pCR=Pathologic complete response.

The "n" denotes the number of patients. In case of categorical variables, percentages are expressed between brackets. In case of continuous variables, mean value is reported. In case of nonnormal continuous variables, median value is reported, with interquartile range between brackets.



Supplementary Table S3. Association of BRCA status with pCR after univariate and multivariate analysis in the whole population

| Variable                  | Class          | Nb in    |       |        | Univariate    |                |                 |                 | Multivariate  |                |                 |
|---------------------------|----------------|----------|-------|--------|---------------|----------------|-----------------|-----------------|---------------|----------------|-----------------|
|                           |                | Nb total | model | Events | HR            | CI             | RCH             | p               | HR            | CI             | p               |
| <b>Pre-NAC parameters</b> |                |          |       |        |               |                |                 |                 |               |                |                 |
| <b>Age (years)</b>        |                |          |       |        |               |                |                 |                 |               |                |                 |
| Menopausal status         | pre            | 227      | 227   | 70     | 1             |                | 30.8 %          |                 |               |                |                 |
|                           | post           | 38       | 38    | 14     | 1.31          | [0.63 - 2.65]  | 36.8 %          | 0,46            |               |                |                 |
| BMI class                 | ≤19            | 23       | 23    | 8      | 1             |                | 34.8 %          |                 |               |                |                 |
|                           | 19-25          | 177      | 177   | 56     | 0.87          | [0.36 - 2.27]  | 31.6 %          | 0,76            |               |                |                 |
|                           | 25-30          | 47       | 47    | 17     | 1.06          | [0.38 - 3.11]  | 36.2 %          | 0,90            |               |                |                 |
|                           | >30            | 18       | 18    | 3      | 0.37          | [0.07 - 1.58]  | 16.7 %          | 0,20            |               |                |                 |
| BRCA status               | BRCA mutation  | 46       | 46    | 21     | 1             |                | 45.7 %          |                 |               |                |                 |
|                           | BRCA wild-type | 220      | 220   | 63     | 0.48          | [0.25 - 0.92]  | 28.6 %          | <b>0,03</b>     |               |                |                 |
| Tumor size                | T1             | 27       | 27    | 15     | 1             |                | 55.6 %          |                 |               |                |                 |
|                           | T2             | 181      | 181   | 57     | 0.37          | [0.16 - 0.83]  | 31.5 %          | <b>0,02</b>     | 0.51          | [0.17 - 1.49]  | 0.22            |
|                           | T3             | 58       | 58    | 12     | 0.21          | [0.08 - 0.55]  | 20.7 %          | <b>&lt;0.01</b> | 0.26          | [0.07 - 0.89]  | <b>0,03</b>     |
| Clinical nodal status     | N0             | 110      | 110   | 33     | 1             |                | 30%             |                 |               |                |                 |
|                           | N1             | 145      | 145   | 48     | 1.15          | [0.68 - 1.98]  | 33.1 %          | 0,61            |               |                |                 |
|                           | N2             | 8        | 8     | 2      | 0.78          | [0.11 - 3.58]  | 25%             | 0,77            |               |                |                 |
|                           | N3             | 3        | 3     | 1      | 1.17          | [0.05 - 12.59] | 33.3 %          | 0,91            |               |                |                 |
| Grade                     | I              | 7        | 7     | 1      | 1             |                | 14.3 %          |                 |               |                |                 |
|                           | II             | 78       | 78    | 17     | 1.67          | [0.26 - 32.72] | 21.8 %          | 0,65            |               |                |                 |
|                           | III            | 176      | 176   | 66     | 3.6           | [0.6 - 68.78]  | 37.5 %          | 0.24            |               |                |                 |
| Mitotic index             | ≤22            | 101      | 101   | 29     | 1             |                | 28.7 %          |                 |               |                |                 |
|                           | >22            | 88       | 88    | 34     | 1.56          | [0.85 - 2.89]  | 38.6 %          | 0.15            | 0.89          | [0.42 - 1.83]  | 0.74            |
| BC subtype                | luminal        | 89       | 89    | 9      | 1             |                | 10.1 %          |                 |               |                |                 |
|                           | TNBC           | 110      | 110   | 49     | 7.14          | [3.39 - 16.57] | 44.5 %          | <b>&lt;0.01</b> | 8.6           | [2.76 - 33.41] | <b>&lt;0.01</b> |
|                           | HER2           | 67       | 67    | 26     | 5.64          | [2.5 - 13.78]  | 38.8 %          | <b>&lt;0.01</b> | 6.31          | [1.99 - 24.48] | <b>&lt;0.01</b> |
| str TILs (%)              |                |          | 84    | 1.03   | [1.02 - 1.05] |                | <b>&lt;0.01</b> | 1.01            | [0.99 - 1.04] | 0.33           |                 |
| IT TILs (%)               |                |          | 84    | 1.04   | [1.02 - 1.07] |                | <b>&lt;0.01</b> | 1.03            | [0.98 - 1.07] | 0.24           |                 |
| NAC regimen               | AC             | 29       | 29    | 7      | 1             |                | 24.1 %          |                 |               |                |                 |
|                           | AC-Taxanes     | 221      | 221   | 72     | 1.52          | [0.65 - 3.99]  | 32.6 %          | 0,36            |               |                |                 |
|                           | Taxanes        | 7        | 7     | 3      | 2.36          | [0.39 - 13.48] | 42.9 %          | 0,33            |               |                |                 |
|                           | Others         | 9        | 9     | 2      | 0.9           | [0.12 - 4.86]  | 22.2 %          | 0,91            |               |                |                 |

Abbreviation, BMI =body mass index; ER=oestrogen receptor; PR=progesterone receptor; TNBC= triple negative breast cancer; str TILs= stromal tumor-infiltrating lymphocytes ; IT TILs= intratumoral-infiltrating lymphocytes ; NAC=neoadjuvant chemotherapy ; AC=anthracyclines ; pCR=Pathologic complete response.

## Supplementary Figures

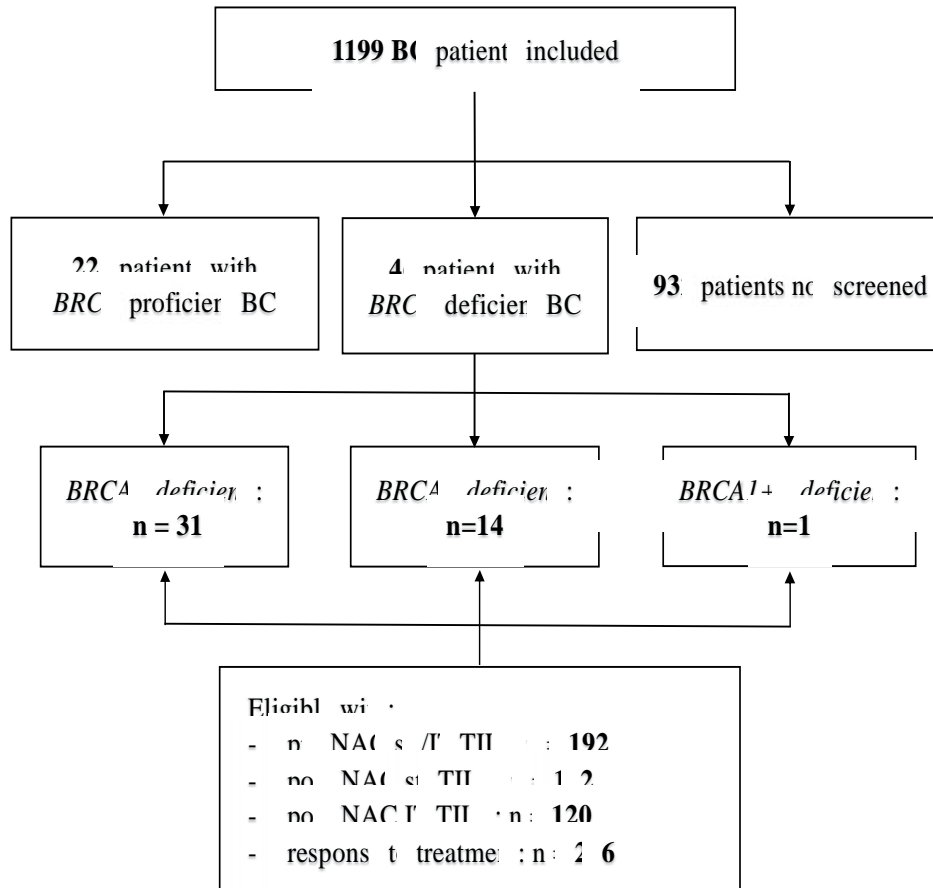

Supplementary Figure S 1. Study flow diagram of included patients and tumors samples available

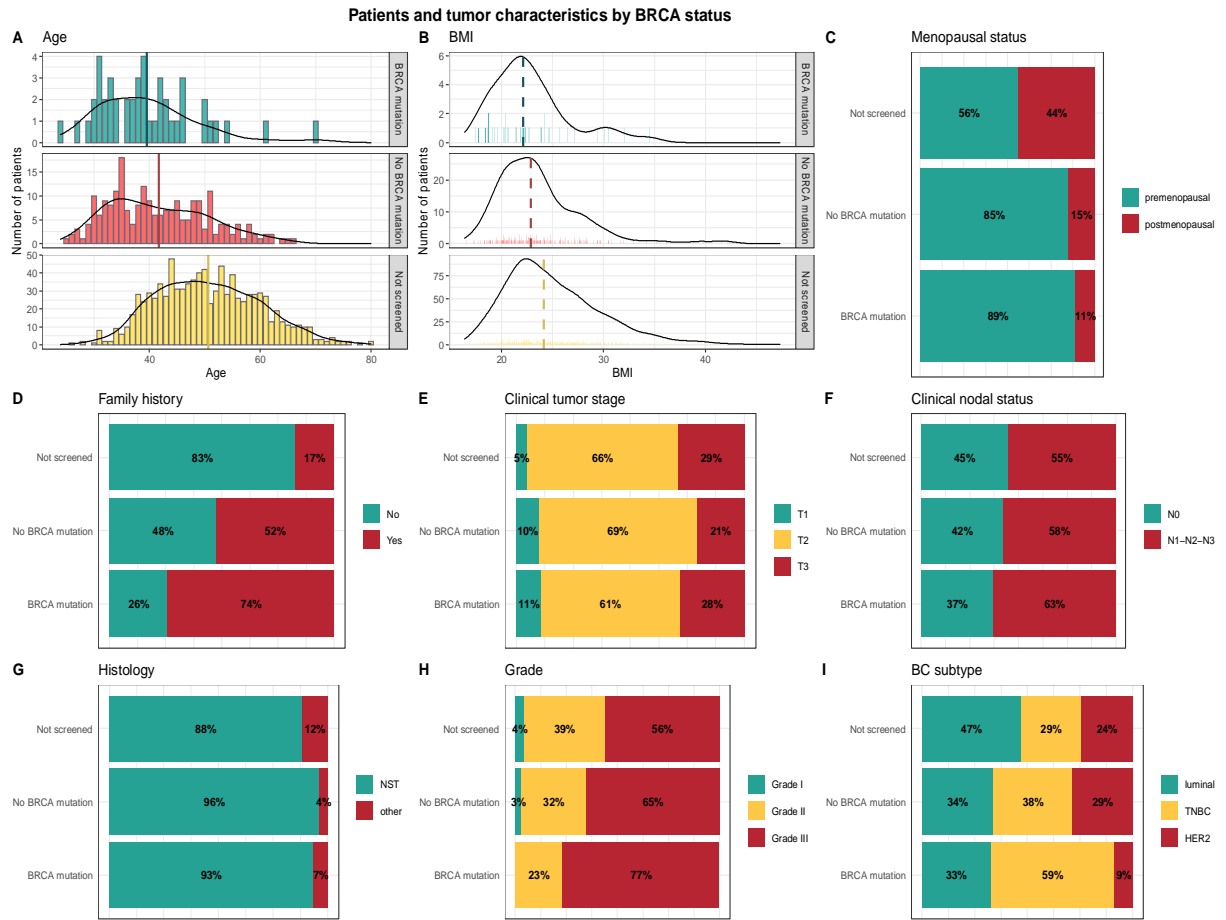

**Supplementary Figure S 2.** Patients' and tumors' characteristics by BRCA status. (All (n=1199), BRCA mutation (n=36), BRCA wild-type (n=156), not screened (n=1007)). **A**, Age (kernel density plot). **B**, BMI (kernel density plot). **C**, Menopausal status (barplot). **D**, Family history (barplot). **E**, Clinical tumor stage (barplot). **F**, Clinical nodal status (barplot). **G**, Histology (barplot). **H**, Grade (barplot). **I**, BC subtype (barplot).

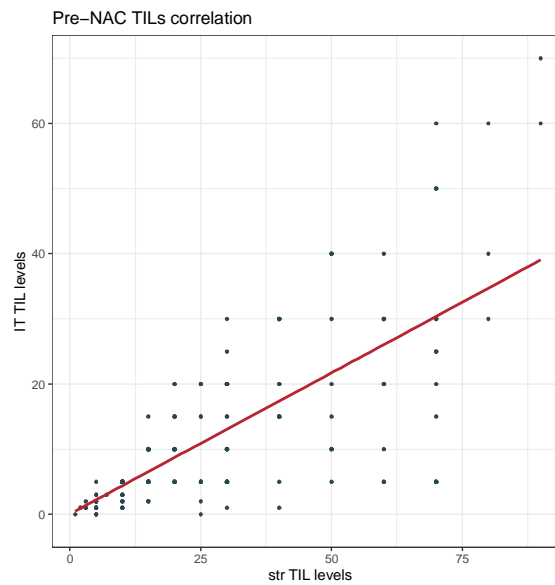

**Supplementary Figure S 3.** Variation of pre-NAC str TIL levels according to the pre-NAC IT TIL levels (scatterplot) (str TILs (n=192), IT TILs (n=192)).

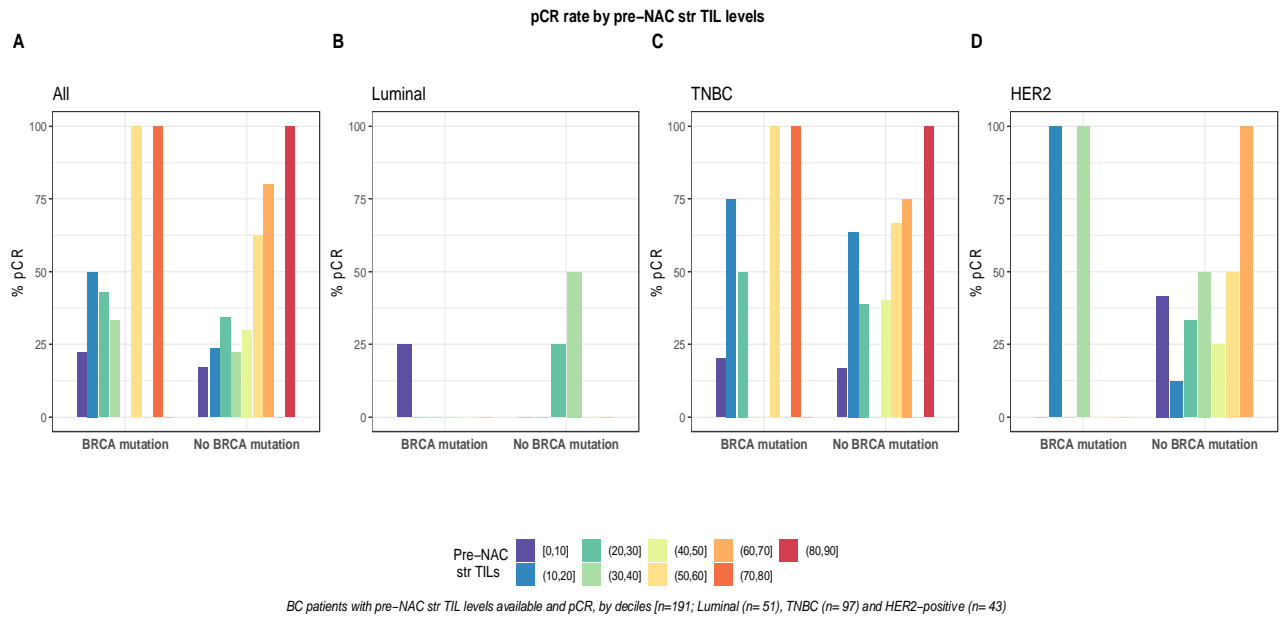

**Supplementary Figure S 4.** pCR rate by pre-NAC str TIL levels by BRCA status (TILs were binned by increments of 10%). **A**, whole population (n=191, BRCA mutation (n=36), BRCA wild-type(n=155)). **B**, luminal tumors (n=51, BRCA mutation(n=8), BRCA wild-type(n=43)). **C**, TNBC (n=97), BRCA mutation(n=24), BRCA wild-type(n=73)). **D**, HER2-positive BC (n=43, BRCA mutation(n=4), BRCA wild-type(n=39)).

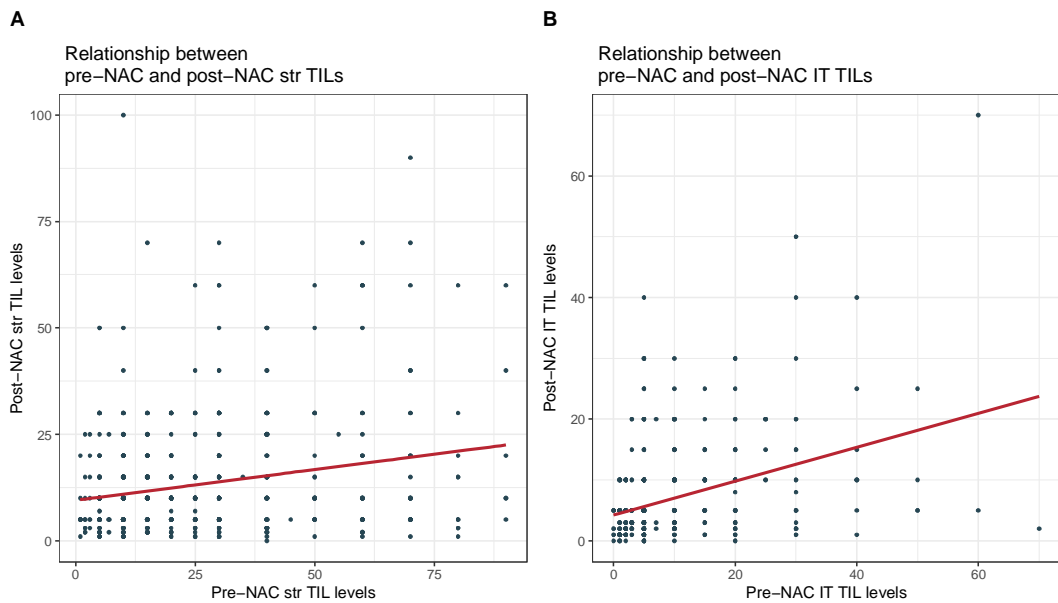

**Supplementary Figure S 5.** TILs correlation between pre and post-NAC. **A**, Variation of post-NAC str TIL levels according to the pre-NAC str TIL levels (scatterplot) (pre-NAC str TILs (n=192), post-NAC str TILs (n=192)). **B**, Variation of post-NAC IT TIL levels according to the pre-NAC IT TIL levels (scatterplot) (pre-NAC IT TILs (n=192), post-NAC IT TILs (n=120)).

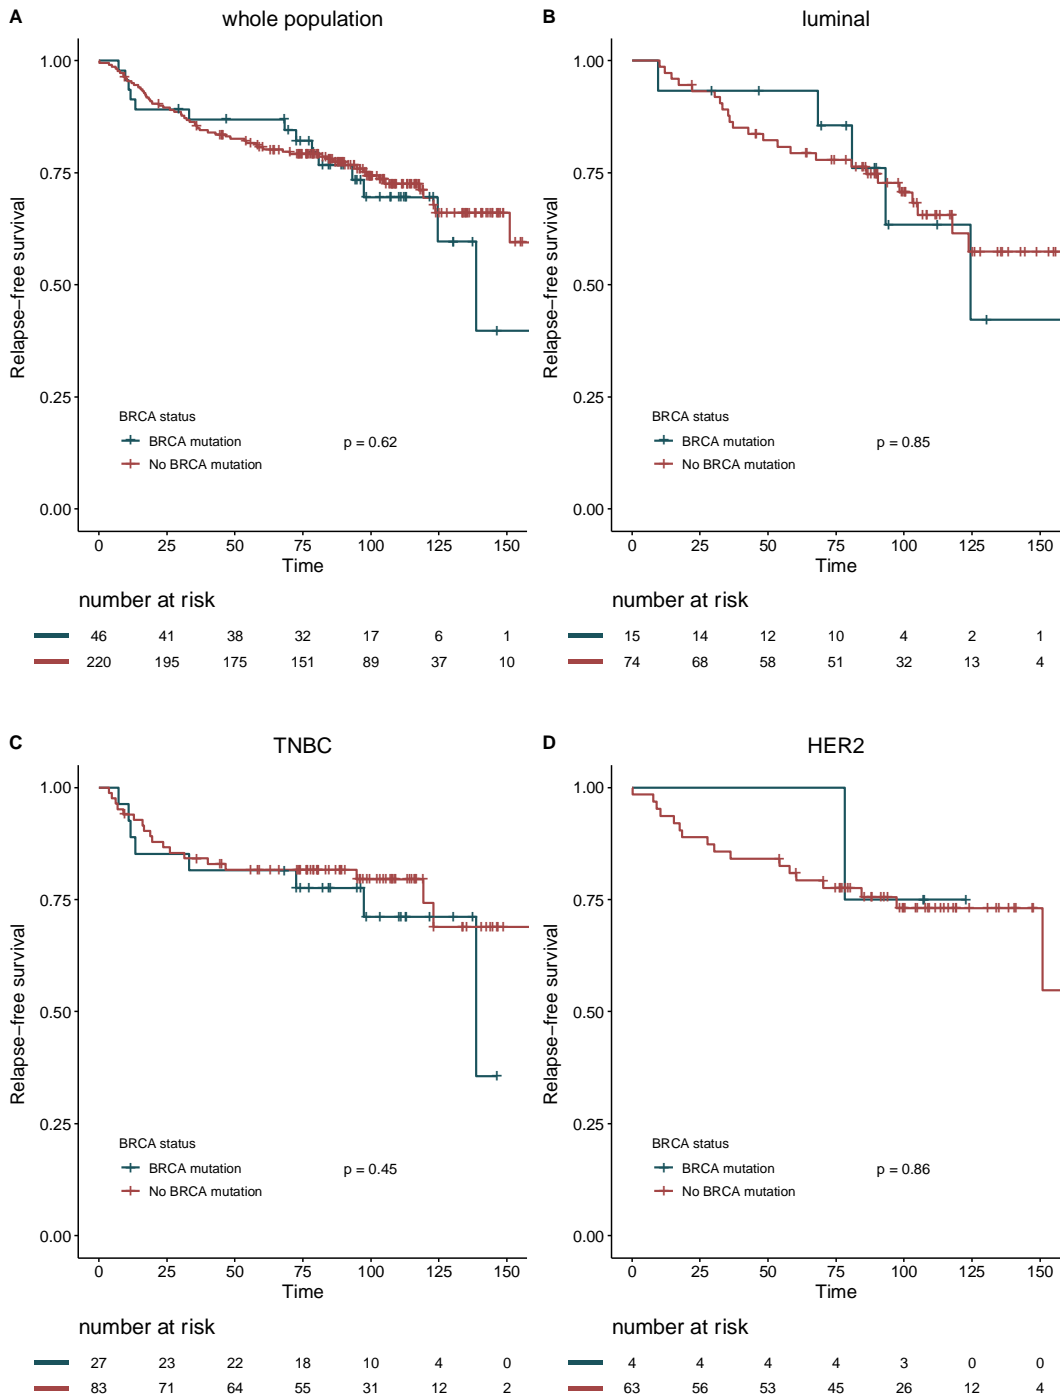

**Supplementary Figure S 6.** Relapse free survival curves according BRCA status. **A**, whole population (n=267, BRCA mutation (n=46), BRCA wild-type(n=220)). **B**, luminal tumors (n=89, BRCA mutation(n=15), BRCA wild-type(n=74)). **C**, TNBC (n=110, BRCA mutation(n=27), BRCA wild-type(n=83)). **D**, HER2-positive BC (n=67, BRCA mutation(n=4), BRCA wild-type(n=63)).

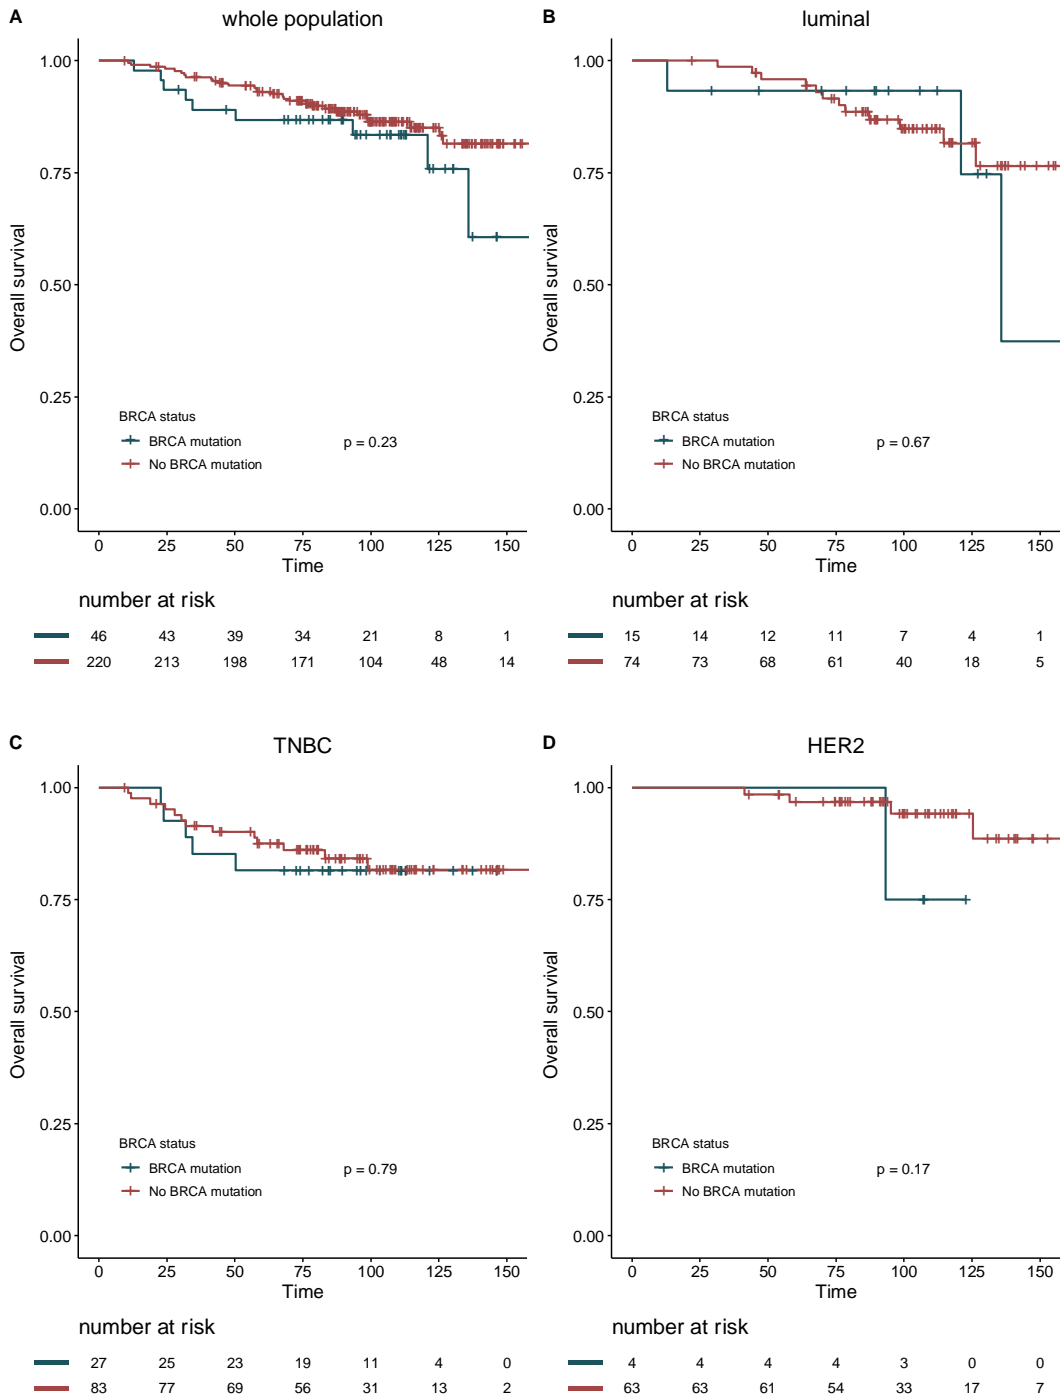

**Supplementary Figure S 7 .** Overall survival curves according BRCA status. **A**, whole population (n=267, BRCA mutation (n=46), BRCA wild-type(n=220)). **B**, luminal tumors (n=89, BRCA mutation(n=15), BRCA wild-type(n=74)). **C**, TNBC (n=110, BRCA mutation(n=27), BRCA wild-type(n=83)). **D**, HER2-positive BC (n=67, BRCA mutation(n=4), BRCA wild-type(n=63)).
